# Supplementary material
Source: ML conference proceedings conference paper supplement (https://proceedings.mlr.press/v108/mokhtari20a.html)
Supplement: Supplementary file [file mokhtari20a-supp.pdf]

## 8 Supplementary Material

### 8.1 Proof of Theorem 1

First, note that the update of the Proximal Point (PP) method for the bilinear problem (Assumption 1) can be written as

$$\mathbf{x}_{k+1} = \mathbf{x}_k - \eta \mathbf{B} \mathbf{y}_{k+1}, \quad (16)$$

$$\mathbf{y}_{k+1} = \mathbf{y}_k + \eta \mathbf{B}^\top \mathbf{x}_{k+1}. \quad (17)$$

We can simplify the above iterations and write them as an explicit algorithm as follows:

$$\mathbf{x}_{k+1} = (\mathbf{I} + \eta^2 \mathbf{B} \mathbf{B}^\top)^{-1} (\mathbf{x}_k - \eta \mathbf{B} \mathbf{y}_k), \quad (18)$$

$$\mathbf{y}_{k+1} = (\mathbf{I} + \eta^2 \mathbf{B}^\top \mathbf{B})^{-1} (\mathbf{y}_k + \eta \mathbf{B}^\top \mathbf{x}_k). \quad (19)$$

Let us define the symmetric matrices  $\mathbf{Q}_x = (\mathbf{I} + \eta^2 \mathbf{B} \mathbf{B}^\top)^{-1}$  and  $\mathbf{Q}_y = (\mathbf{I} + \eta^2 \mathbf{B}^\top \mathbf{B})^{-1}$ . Based on these definitions, and the expressions in (18) and (19) we can show that the sum  $\|\mathbf{x}_{k+1}\|^2 + \|\mathbf{y}_{k+1}\|^2$  can be written as

$$\begin{aligned} \|\mathbf{x}_{k+1}\|^2 + \|\mathbf{y}_{k+1}\|^2 &= \|\mathbf{Q}_x \mathbf{x}_k\|^2 + \eta^2 \|\mathbf{Q}_x \mathbf{B} \mathbf{y}_k\|^2 + \|\mathbf{Q}_y \mathbf{y}_k\|^2 + \eta^2 \|\mathbf{Q}_y \mathbf{B}^\top \mathbf{x}_k\|^2 \\ &\quad - 2\eta \mathbf{x}_k^\top \mathbf{Q}_x \mathbf{B} \mathbf{y}_k + 2\eta \mathbf{y}_k^\top \mathbf{Q}_y \mathbf{B}^\top \mathbf{x}_k. \end{aligned} \quad (20)$$

To simplify the expression in (20) we first prove the following lemma which is also useful in the rest of proofs.

**Lemma 1.** *The matrices  $\mathbf{B} \in \mathbb{R}^{d \times d}$ ,  $\mathbf{Q}_x = (\mathbf{I} + \eta^2 \mathbf{B} \mathbf{B}^\top)^{-1}$ , and  $\mathbf{Q}_y = (\mathbf{I} + \eta^2 \mathbf{B}^\top \mathbf{B})^{-1}$  satisfy the following properties:*

$$\mathbf{Q}_x \mathbf{B} = \mathbf{B} \mathbf{Q}_y, \quad (21)$$

$$\mathbf{Q}_y \mathbf{B}^\top = \mathbf{B}^\top \mathbf{Q}_x. \quad (22)$$

*Proof.* Let  $\mathbf{B} = \mathbf{U} \mathbf{\Lambda} \mathbf{V}^\top$  be the singular value decomposition of  $\mathbf{B}$ . Here  $\mathbf{U}$  and  $\mathbf{V}$  are orthonormal matrices and  $\mathbf{\Lambda}$  is a diagonal matrix with the eigenvalues of  $\mathbf{B}$  as the diagonal entries. Then, we have:

$$\begin{aligned} \mathbf{Q}_x \mathbf{B} &= (\mathbf{I} + \eta^2 \mathbf{U} \mathbf{\Lambda} \mathbf{V}^\top \mathbf{V} \mathbf{\Lambda} \mathbf{U}^\top)^{-1} \mathbf{U} \mathbf{\Lambda} \mathbf{V}^\top \\ &= (\mathbf{U} (\eta^2 \mathbf{\Lambda}^2 + \mathbf{I}) \mathbf{U}^\top)^{-1} \mathbf{U} \mathbf{\Lambda} \mathbf{V}^\top \\ &= \mathbf{U} (\eta^2 \mathbf{\Lambda}^2 + \mathbf{I})^{-1} \mathbf{U}^\top \mathbf{U} \mathbf{\Lambda} \mathbf{V}^\top \\ &= \mathbf{U} (\eta^2 \mathbf{\Lambda}^2 + \mathbf{I})^{-1} \mathbf{\Lambda} \mathbf{V}^\top \end{aligned} \quad (23)$$

Here we used the property that  $\mathbf{U}^\top \mathbf{U} = \mathbf{V}^\top \mathbf{V} = \mathbf{I}$ . Now, we simplify the other side to get:

$$\begin{aligned} \mathbf{B} \mathbf{Q}_y &= \mathbf{U} \mathbf{\Lambda} \mathbf{V}^\top (\mathbf{I} + \eta^2 \mathbf{V} \mathbf{\Lambda} \mathbf{U}^\top \mathbf{U} \mathbf{\Lambda} \mathbf{V}^\top)^{-1} \\ &= \mathbf{U} \mathbf{\Lambda} \mathbf{V}^\top (\mathbf{V} (\eta^2 \mathbf{\Lambda}^2 + \mathbf{I}) \mathbf{V}^\top)^{-1} \\ &= \mathbf{U} \mathbf{\Lambda} \mathbf{V}^\top \mathbf{V} (\eta^2 \mathbf{\Lambda}^2 + \mathbf{I})^{-1} \mathbf{V}^\top \\ &= \mathbf{U} \mathbf{\Lambda} (\eta^2 \mathbf{\Lambda}^2 + \mathbf{I})^{-1} \mathbf{V}^\top \end{aligned} \quad (24)$$

Now, since  $\mathbf{U} (\eta^2 \mathbf{\Lambda}^2 + \mathbf{I})^{-1} \mathbf{\Lambda}^2 \mathbf{V}^\top = \mathbf{U} \mathbf{\Lambda} (\eta^2 \mathbf{\Lambda} + \mathbf{I})^{-1} \mathbf{V}^\top$ , the claim in (21) follows. Using a similar argument we can also prove the equality in (22).  $\square$

Using the result in Lemma 1 we can show that

$$\mathbf{x}_k^\top \mathbf{Q}_x \mathbf{B} \mathbf{y}_k = \mathbf{x}_k^\top \mathbf{B} \mathbf{Q}_y \mathbf{y}_k = \mathbf{y}_k^\top \mathbf{Q}_y \mathbf{B}^\top \mathbf{x}_k, \quad (25)$$

where the second equality holds as  $\mathbf{a}^\top \mathbf{b} = \mathbf{b}^\top \mathbf{a}$ . Hence, the expression in (20) can be simplified as

$$\|\mathbf{x}_{k+1}\|^2 + \|\mathbf{y}_{k+1}\|^2 = \|\mathbf{Q}_x \mathbf{x}_k\|^2 + \eta^2 \|\mathbf{Q}_x \mathbf{B} \mathbf{y}_k\|^2 + \|\mathbf{Q}_y \mathbf{y}_k\|^2 + \eta^2 \|\mathbf{Q}_y \mathbf{B}^\top \mathbf{x}_k\|^2. \quad (26)$$

We simplify equation (26) as follows. Consider the term involving  $\mathbf{x}_k$ . We have

$$\begin{aligned}\|\mathbf{Q}_x \mathbf{x}_k\|^2 + \eta^2 \|\mathbf{Q}_y \mathbf{B}^\top \mathbf{x}_k\|^2 &= \mathbf{x}_k^\top \mathbf{Q}_x^2 \mathbf{x}_k + \eta^2 \mathbf{x}_k^\top \mathbf{B} \mathbf{Q}_y^2 \mathbf{B}^\top \mathbf{x}_k \\ &= \mathbf{x}_k^\top (\mathbf{Q}_x^2 + \eta^2 \mathbf{B} \mathbf{Q}_y^2 \mathbf{B}^\top) \mathbf{x}_k\end{aligned}\quad (27)$$

Now we use Lemma 1 to simplify (27) as follows

$$\begin{aligned}\|\mathbf{Q}_x \mathbf{x}_k\|^2 + \eta^2 \|\mathbf{Q}_y \mathbf{B}^\top \mathbf{x}_k\|^2 &= \mathbf{x}_k^\top (\mathbf{Q}_x^2 + \eta^2 \mathbf{B} \mathbf{Q}_y^2 \mathbf{B}^\top) \mathbf{x}_k \\ &= \mathbf{x}_k^\top (\mathbf{Q}_x^2 + \eta^2 \mathbf{B} \mathbf{Q}_y \mathbf{B}^\top \mathbf{Q}_x) \mathbf{x}_k \\ &= \mathbf{x}_k^\top (\mathbf{Q}_x^2 + \eta^2 \mathbf{B} \mathbf{B}^\top \mathbf{Q}_x \mathbf{Q}_x) \mathbf{x}_k \\ &= \mathbf{x}_k^\top (\mathbf{I} + \eta^2 \mathbf{B} \mathbf{B}^\top) \mathbf{Q}_x^2 \mathbf{x}_k \\ &= \mathbf{x}_k^\top (\mathbf{I} + \eta^2 \mathbf{B} \mathbf{B}^\top)^{-1} \mathbf{x}_k,\end{aligned}\quad (28)$$

where the last equality follows by replacing  $\mathbf{Q}_x$  by its definition. The same simplification follows for the terms involving  $\mathbf{y}_k$  which leads to the expression

$$\|\mathbf{Q}_y \mathbf{y}_k\|^2 + \eta^2 \|\mathbf{Q}_x \mathbf{B} \mathbf{y}_k\|^2 = \mathbf{y}_k^\top (\mathbf{I} + \eta^2 \mathbf{B}^\top \mathbf{B})^{-1} \mathbf{y}_k. \quad (29)$$

Substitute  $\|\mathbf{Q}_x \mathbf{x}_k\|^2 + \eta^2 \|\mathbf{Q}_y \mathbf{B}^\top \mathbf{x}_k\|^2$  and  $\|\mathbf{Q}_y \mathbf{y}_k\|^2 + \eta^2 \|\mathbf{Q}_x \mathbf{B} \mathbf{y}_k\|^2$  in (26) with the expressions in (28) and (29), respectively, to obtain

$$\|\mathbf{x}_{k+1}\|^2 + \|\mathbf{y}_{k+1}\|^2 = \mathbf{x}_k^\top (\mathbf{I} + \eta^2 \mathbf{B} \mathbf{B}^\top)^{-1} \mathbf{x}_k + \mathbf{y}_k^\top (\mathbf{I} + \eta^2 \mathbf{B}^\top \mathbf{B})^{-1} \mathbf{y}_k. \quad (30)$$

Now, using the expression in (30) and the fact that  $\lambda_{\min}(\mathbf{B}^\top \mathbf{B}) = \lambda_{\min}(\mathbf{B} \mathbf{B}^\top)$  we can write

$$\|\mathbf{x}_{k+1}\|^2 + \|\mathbf{y}_{k+1}\|^2 \leq \left( \frac{1}{1 + \eta^2 \lambda_{\min}(\mathbf{B}^\top \mathbf{B})} \right) (\|\mathbf{x}_k\|^2 + \|\mathbf{y}_k\|^2), \quad (31)$$

and the claim in Theorem 1 follows.

## 8.2 Proof of Theorem 2

The update of PP method can be written as

$$\begin{aligned}\mathbf{x}_{k+1} &= \mathbf{x}_k - \eta \nabla_{\mathbf{x}} f(\mathbf{x}_{k+1}, \mathbf{y}_{k+1}), \\ \mathbf{y}_{k+1} &= \mathbf{y}_k + \eta \nabla_{\mathbf{y}} f(\mathbf{x}_{k+1}, \mathbf{y}_{k+1}).\end{aligned}\quad (32)$$

Consider the function  $\phi_f : \mathbb{R}^m \rightarrow \mathbb{R}$  defined as

$$\phi_{\mathbf{y}_{k+1}}(\mathbf{x}) := f(\mathbf{x}, \mathbf{y}_{k+1}) + \frac{1}{2\eta} \|\mathbf{x} - \mathbf{x}_k\|^2. \quad (33)$$

It is easy to check that  $\phi_f$  is  $\mu_x + \frac{1}{\eta}$  strongly convex, and it also can be verified that  $\mathbf{x}_{k+1} = \arg\min_{\mathbf{x}} \phi_f(\mathbf{x})$ . Hence, using strong convexity of  $\phi_f$ , for any  $\mathbf{x} \in \mathbb{R}^m$ , we have

$$\phi_{\mathbf{y}_{k+1}}(\mathbf{x}) - \phi_{\mathbf{y}_{k+1}}(\mathbf{x}_{k+1}) \geq \frac{1}{2} \left( \mu_x + \frac{1}{\eta} \right) \|\mathbf{x} - \mathbf{x}_{k+1}\|^2, \quad (34)$$

where we used the fact that  $\nabla \phi_{\mathbf{y}_{k+1}}(\mathbf{x}_{k+1}) = \mathbf{0}$ . Replace  $\phi_{\mathbf{y}_{k+1}}(\mathbf{x})$  and  $\phi_{\mathbf{y}_{k+1}}(\mathbf{x}_{k+1})$  with their definition in (33) and further set  $\mathbf{x} = \mathbf{x}^*$  to obtain

$$\begin{aligned}f(\mathbf{x}^*, \mathbf{y}_{k+1}) - f(\mathbf{x}_{k+1}, \mathbf{y}_{k+1}) &\geq \frac{1}{2} \left( \mu_x + \frac{1}{\eta} \right) \|\mathbf{x}_{k+1} - \mathbf{x}^*\|^2 - \frac{1}{2\eta} \|\mathbf{x}_k - \mathbf{x}^*\|^2 + \frac{1}{2\eta} \|\mathbf{x}_{k+1} - \mathbf{x}_k\|^2 \\ &\geq \frac{1}{2} \left( \mu_x + \frac{1}{\eta} \right) \|\mathbf{x}_{k+1} - \mathbf{x}^*\|^2 - \frac{1}{2\eta} \|\mathbf{x}_k - \mathbf{x}^*\|^2.\end{aligned}\quad (35)$$

Once again, consider the function:

$$\phi_{\mathbf{x}_{k+1}}(\mathbf{y}) = -f(\mathbf{x}_{k+1}, \mathbf{y}) + \frac{1}{2\eta} \|\mathbf{y} - \mathbf{y}_k\|^2. \quad (36)$$

It is  $\mu_y + \frac{1}{\eta}$  strongly convex and is minimized at  $\mathbf{y}_{k+1}$ . Therefore, for any  $\mathbf{y} \in \mathbb{R}^n$ , we have

$$\phi_{\mathbf{x}_{k+1}}(\mathbf{y}) - \phi_{\mathbf{x}_{k+1}}(\mathbf{y}_{k+1}) \geq \frac{1}{2} \left( \mu_y + \frac{1}{\eta} \right) \|\mathbf{y} - \mathbf{y}_{k+1}\|^2 \quad (37)$$

since  $\nabla \phi_{\mathbf{x}_{k+1}}(\mathbf{y}_{k+1}) = \mathbf{0}$ . Replace  $\phi_{\mathbf{x}_{k+1}}(\mathbf{y})$  and  $\phi_{\mathbf{x}_{k+1}}(\mathbf{y}_{k+1})$  with their definitions and further set  $\mathbf{y} = \mathbf{y}^*$  to obtain

$$\begin{aligned} f(\mathbf{x}_{k+1}, \mathbf{y}_{k+1}) - f(\mathbf{x}_{k+1}, \mathbf{y}^*) &\geq \frac{1}{2} \left( \mu_y + \frac{1}{\eta} \right) \|\mathbf{y}_{k+1} - \mathbf{y}^*\|^2 - \frac{1}{2\eta} \|\mathbf{y}_k - \mathbf{y}^*\|^2 + \frac{1}{2\eta} \|\mathbf{y}_{k+1} - \mathbf{y}_k\|^2 \\ &\geq \frac{1}{2} \left( \mu_y + \frac{1}{\eta} \right) \|\mathbf{y}_{k+1} - \mathbf{y}^*\|^2 - \frac{1}{2\eta} \|\mathbf{y}_k - \mathbf{y}^*\|^2. \end{aligned} \quad (38)$$

The saddle point property implies that the optimal solution set  $(\mathbf{x}^*, \mathbf{y}^*)$  satisfies the following inequalities for any  $\mathbf{x} \in \mathbb{R}^m$  and  $\mathbf{y} \in \mathbb{R}^n$ :

$$f(\mathbf{x}^*, \mathbf{y}) \leq f(\mathbf{x}^*, \mathbf{y}^*) \leq f(\mathbf{x}, \mathbf{y}^*). \quad (39)$$

In particular, by setting  $(\mathbf{x}, \mathbf{y}) = (\mathbf{x}_{k+1}, \mathbf{y}_{k+1})$  we obtain that

$$f(\mathbf{x}^*, \mathbf{y}_{k+1}) \leq f(\mathbf{x}^*, \mathbf{y}^*) \leq f(\mathbf{x}_{k+1}, \mathbf{y}^*). \quad (40)$$

Now, considering (35), by adding and subtracting  $f(\mathbf{x}^*, \mathbf{y}^*)$  we can write

$$\begin{aligned} f(\mathbf{x}^*, \mathbf{y}_{k+1}) - f(\mathbf{x}^*, \mathbf{y}^*) + f(\mathbf{x}^*, \mathbf{y}^*) - f(\mathbf{x}_{k+1}, \mathbf{y}_{k+1}) \\ \geq \frac{1}{2} \left( \mu_x + \frac{1}{\eta} \right) \|\mathbf{x}_{k+1} - \mathbf{x}^*\|^2 - \frac{1}{2\eta} \|\mathbf{x}_k - \mathbf{x}^*\|^2, \end{aligned} \quad (41)$$

Regroup the terms to obtain

$$\begin{aligned} f(\mathbf{x}^*, \mathbf{y}_{k+1}) - f(\mathbf{x}^*, \mathbf{y}^*) \\ \geq \frac{1}{2} \left( \mu_x + \frac{1}{\eta} \right) \|\mathbf{x}_{k+1} - \mathbf{x}^*\|^2 - \frac{1}{2\eta} \|\mathbf{x}_k - \mathbf{x}^*\|^2 - f(\mathbf{x}^*, \mathbf{y}^*) + f(\mathbf{x}_{k+1}, \mathbf{y}_{k+1}). \end{aligned} \quad (42)$$

By using the inequality in (40) we can write

$$\frac{1}{2} \left( \mu_x + \frac{1}{\eta} \right) \|\mathbf{x}_{k+1} - \mathbf{x}^*\|^2 - \frac{1}{2\eta} \|\mathbf{x}_k - \mathbf{x}^*\|^2 - f(\mathbf{x}^*, \mathbf{y}^*) + f(\mathbf{x}_{k+1}, \mathbf{y}_{k+1}) \leq 0 \quad (43)$$

Similarly, considering (38), we can write

$$\begin{aligned} f(\mathbf{x}_{k+1}, \mathbf{y}_{k+1}) - f(\mathbf{x}^*, \mathbf{y}^*) + f(\mathbf{x}^*, \mathbf{y}^*) - f(\mathbf{x}_{k+1}, \mathbf{y}^*) \\ \geq \frac{1}{2} \left( \mu_y + \frac{1}{\eta} \right) \|\mathbf{y}_{k+1} - \mathbf{y}^*\|^2 - \frac{1}{2\eta} \|\mathbf{y}_k - \mathbf{y}^*\|^2, \end{aligned} \quad (44)$$

and, therefore,

$$\frac{1}{2} \left( \mu_y + \frac{1}{\eta} \right) \|\mathbf{y}_{k+1} - \mathbf{y}^*\|^2 - \frac{1}{2\eta} \|\mathbf{y}_k - \mathbf{y}^*\|^2 - f(\mathbf{x}_{k+1}, \mathbf{y}_{k+1}) + f(\mathbf{x}^*, \mathbf{y}^*) \leq 0. \quad (45)$$

Add equations (43) and (45), and use the definition  $\mu = \min\{\mu_x, \mu_y\}$  to obtain

$$\frac{1}{2} \left( \mu + \frac{1}{\eta} \right) \left( \|\mathbf{x}_{k+1} - \mathbf{x}^*\|^2 + \|\mathbf{y}_{k+1} - \mathbf{y}^*\|^2 \right) \leq \frac{1}{2\eta} \left( \|\mathbf{x}_k - \mathbf{x}^*\|^2 + \|\mathbf{y}_k - \mathbf{y}^*\|^2 \right). \quad (46)$$

Regrouping the terms and using the definition  $r_k = \|\mathbf{x}_k - \mathbf{x}^*\|^2 + \|\mathbf{y}_k - \mathbf{y}^*\|^2$  leads to

$$\begin{aligned} r_{k+1} &\leq \frac{1}{\eta} \left( \mu + \frac{1}{\eta} \right)^{-1} r_k \\ &= \frac{1}{1 + \eta\mu} r_k, \end{aligned} \quad (47)$$

and the proof is complete.

### 8.3 Proof of Proposition 1

We start from the Proximal Point (PP) dynamics and show that an  $\mathcal{O}(\eta^2)$  approximation of this dynamics leads to OGD. The PP updates are as follows

$$\begin{aligned} \mathbf{x}_{k+1} &= \mathbf{x}_k - \eta \nabla_{\mathbf{x}} f(\mathbf{x}_k - \eta \nabla_{\mathbf{x}} f(\mathbf{x}_{k+1}, \mathbf{y}_{k+1}), \mathbf{y}_k + \eta \nabla_{\mathbf{y}} f(\mathbf{x}_{k+1}, \mathbf{y}_{k+1})) \\ \mathbf{x}_{k+1} &= \mathbf{x}_k - \eta \nabla_{\mathbf{x}} f(\mathbf{x}_k - \eta \nabla_{\mathbf{x}} f(\mathbf{x}_{k+1}, \mathbf{y}_{k+1}), \mathbf{y}_k + \eta \nabla_{\mathbf{y}} f(\mathbf{x}_{k+1}, \mathbf{y}_{k+1})) \end{aligned}$$

By writing the Taylor's expansion of  $\nabla_{\mathbf{x}} f$ , we obtain

$$\begin{aligned} &\nabla_{\mathbf{x}} f(\mathbf{x}_k - \eta \nabla_{\mathbf{x}} f(\mathbf{x}_{k+1}, \mathbf{y}_{k+1}), \mathbf{y}_k + \eta \nabla_{\mathbf{y}} f(\mathbf{x}_{k+1}, \mathbf{y}_{k+1})) \\ &= \nabla_{\mathbf{x}} f(\mathbf{x}_k, \mathbf{y}_k) + \nabla_{\mathbf{xx}} f(\mathbf{x}_k, \mathbf{y}_k) [\mathbf{x}_k - \eta \nabla_{\mathbf{x}} f(\mathbf{x}_{k+1}, \mathbf{y}_{k+1}) - \mathbf{x}_k] \\ &\quad + \nabla_{\mathbf{xy}} f(\mathbf{x}_k, \mathbf{y}_k) [\mathbf{y}_k + \eta \nabla_{\mathbf{y}} f(\mathbf{x}_{k+1}, \mathbf{y}_{k+1}) - \mathbf{y}_k] + o(\eta) \\ &= \nabla_{\mathbf{x}} f(\mathbf{x}_k, \mathbf{y}_k) - \eta \nabla_{\mathbf{xx}} f(\mathbf{x}_k, \mathbf{y}_k) \nabla_{\mathbf{x}} f(\mathbf{x}_{k+1}, \mathbf{y}_{k+1}) \\ &\quad + \eta \nabla_{\mathbf{xy}} f(\mathbf{x}_k, \mathbf{y}_k) \nabla_{\mathbf{y}} f(\mathbf{x}_{k+1}, \mathbf{y}_{k+1}) + o(\eta). \end{aligned} \quad (48)$$

Using this expression, we have

$$\begin{aligned} \mathbf{x}_{k+1} &= \mathbf{x}_k - \eta \nabla_{\mathbf{x}} f(\mathbf{x}_k, \mathbf{y}_k) + \eta^2 \nabla_{\mathbf{xx}} f(\mathbf{x}_k, \mathbf{y}_k) \nabla_{\mathbf{x}} f(\mathbf{x}_{k+1}, \mathbf{y}_{k+1}) \\ &\quad - \eta^2 \nabla_{\mathbf{xy}} f(\mathbf{x}_k, \mathbf{y}_k) \nabla_{\mathbf{y}} f(\mathbf{x}_{k+1}, \mathbf{y}_{k+1}) + o(\eta^2) \end{aligned} \quad (49)$$

On adding and subtracting the term  $\eta \nabla_{\mathbf{x}} f(\mathbf{x}_k, \mathbf{y}_k)$ , we get

$$\begin{aligned} \mathbf{x}_{k+1} &= \mathbf{x}_k - 2\eta \nabla_{\mathbf{x}} f(\mathbf{x}_k, \mathbf{y}_k) + \eta (\eta \nabla_{\mathbf{xx}} f(\mathbf{x}_k, \mathbf{y}_k) \nabla_{\mathbf{x}} f(\mathbf{x}_{k+1}, \mathbf{y}_{k+1}) + \nabla_{\mathbf{x}} f(\mathbf{x}_k, \mathbf{y}_k) \\ &\quad - \eta \nabla_{\mathbf{xy}} f(\mathbf{x}_k, \mathbf{y}_k) \nabla_{\mathbf{y}} f(\mathbf{x}_{k+1}, \mathbf{y}_{k+1})) + o(\eta^2) \end{aligned} \quad (50)$$

Note that from the Taylor's expansion of  $\nabla_{\mathbf{xx}} f$ ,  $\nabla_{\mathbf{x}} f$  and the PP updates, we have

$$\nabla_{\mathbf{xx}} f(\mathbf{x}_k, \mathbf{y}_k) = \nabla_{\mathbf{xx}} f(\mathbf{x}_{k-1}, \mathbf{y}_{k-1}) + \mathcal{O}(\eta), \quad \nabla_{\mathbf{x}} f(\mathbf{x}_{k+1}, \mathbf{y}_{k+1}) = \nabla_{\mathbf{x}} f(\mathbf{x}_k, \mathbf{y}_k) + \mathcal{O}(\eta) \quad (51)$$

which leads to

$$\eta \nabla_{\mathbf{xx}} f(\mathbf{x}_k, \mathbf{y}_k) \nabla_{\mathbf{x}} f(\mathbf{x}_{k+1}, \mathbf{y}_{k+1}) = \eta \nabla_{\mathbf{xx}} f(\mathbf{x}_{k-1}, \mathbf{y}_{k-1}) \nabla_{\mathbf{x}} f(\mathbf{x}_k, \mathbf{y}_k) + \mathcal{O}(\eta^2) \quad (52)$$

Again, from the Taylor's expansion of  $\nabla_{\mathbf{xy}} f$ ,  $\nabla_{\mathbf{y}} f$  and the PP updates, we have

$$\nabla_{\mathbf{xy}} f(\mathbf{x}_k, \mathbf{y}_k) = \nabla_{\mathbf{xy}} f(\mathbf{x}_{k-1}, \mathbf{y}_{k-1}) + \mathcal{O}(\eta), \quad \nabla_{\mathbf{y}} f(\mathbf{x}_{k+1}, \mathbf{y}_{k+1}) = \nabla_{\mathbf{y}} f(\mathbf{x}_k, \mathbf{y}_k) + \mathcal{O}(\eta) \quad (53)$$

which implies that

$$\eta \nabla_{\mathbf{xy}} f(\mathbf{x}_k, \mathbf{y}_k) \nabla_{\mathbf{y}} f(\mathbf{x}_{k+1}, \mathbf{y}_{k+1}) = \eta \nabla_{\mathbf{xy}} f(\mathbf{x}_{k-1}, \mathbf{y}_{k-1}) \nabla_{\mathbf{y}} f(\mathbf{x}_k, \mathbf{y}_k) + \mathcal{O}(\eta^2) \quad (54)$$

Making the approximations of Equations (52) and (54) in Equation (50) yields

$$\begin{aligned} \mathbf{x}_{k+1} &= \mathbf{x}_k - 2\eta \nabla_{\mathbf{x}} f(\mathbf{x}_k, \mathbf{y}_k) + \eta (\eta \nabla_{\mathbf{xx}} f(\mathbf{x}_{k-1}, \mathbf{y}_{k-1}) \nabla_{\mathbf{x}} f(\mathbf{x}_k, \mathbf{y}_k) + \nabla_{\mathbf{x}} f(\mathbf{x}_k, \mathbf{y}_k) \\ &\quad - \eta \nabla_{\mathbf{xy}} f(\mathbf{x}_{k-1}, \mathbf{y}_{k-1}) \nabla_{\mathbf{y}} f(\mathbf{x}_k, \mathbf{y}_k) + \mathcal{O}(\eta^2)) + o(\eta^2) \end{aligned} \quad (55)$$

We also know that

$$\begin{aligned} \nabla_{\mathbf{x}}f(\mathbf{x}_{k-1}, \mathbf{y}_{k-1}) + \mathcal{O}(\eta^2) &= \eta \nabla_{\mathbf{xx}}f(\mathbf{x}_{k-1}, \mathbf{y}_{k-1}) \nabla_{\mathbf{x}}f(\mathbf{x}_k, \mathbf{y}_k) + \nabla_{\mathbf{x}}f(\mathbf{x}_k, \mathbf{y}_k) \\ &\quad - \eta \nabla_{\mathbf{xy}}f(\mathbf{x}_{k-1}, \mathbf{y}_{k-1}) \nabla_{\mathbf{y}}f(\mathbf{x}_k, \mathbf{y}_k) + \mathcal{O}(\eta^2) \end{aligned}$$

Making this substitution back in Equation (55), we get

$$\begin{aligned} \mathbf{x}_{k+1} &= \mathbf{x}_k - 2\eta \nabla_{\mathbf{x}}f(\mathbf{x}_k, \mathbf{y}_k) + \eta (\nabla_{\mathbf{x}}f(\mathbf{x}_{k-1}, \mathbf{y}_{k-1}) + \mathcal{O}(\eta^2)) + o(\eta^2) \\ &= \mathbf{x}_k - 2\eta \nabla_{\mathbf{x}}f(\mathbf{x}_k, \mathbf{y}_k) + \eta \nabla_{\mathbf{x}}f(\mathbf{x}_{k-1}, \mathbf{y}_{k-1}) + o(\eta^2) \end{aligned} \quad (56)$$

which is equivalent to the OGD update plus an additional error term of order  $o(\eta^2)$ . The same analysis can be done for the dual updates as well to obtain

$$\mathbf{y}_{k+1} = \mathbf{y}_k + 2\eta \nabla_{\mathbf{y}}f(\mathbf{x}_k, \mathbf{y}_k) - \eta \nabla_{\mathbf{x}}f(\mathbf{x}_{k-1}, \mathbf{y}_{k-1}) + o(\eta^2). \quad (57)$$

This shows that the OGD updates and the PP updates differ by  $o(\eta^2)$ .

#### 8.4 Proof of Theorem 3

We define the following symmetric matrices

$$\begin{aligned} \mathbf{E}_x &= \mathbf{I} - \eta^2 \mathbf{B} \mathbf{B}^\top - (\mathbf{I} + \eta^2 \mathbf{B} \mathbf{B}^\top)^{-1}, \\ \mathbf{E}_y &= \mathbf{I} - \eta^2 \mathbf{B}^\top \mathbf{B} - (\mathbf{I} + \eta^2 \mathbf{B}^\top \mathbf{B})^{-1}. \end{aligned}$$

We rewrite the properties of  $\mathbf{E}_x$  and  $\mathbf{E}_y$  which are

$$\|\mathbf{E}_x\|, \|\mathbf{E}_y\| \leq \frac{\eta^4 \lambda_{\max}(\mathbf{B}^\top \mathbf{B})^2}{1 - \eta^2 \sqrt{\lambda_{\max}^2(\mathbf{B}^\top \mathbf{B})}} = e \quad (58)$$

$$\mathbf{E}_x \mathbf{B} = \mathbf{B} \mathbf{E}_y \quad (59)$$

$$\mathbf{E}_y \mathbf{B}^\top = \mathbf{B}^\top \mathbf{E}_x \quad (60)$$

Recall that the update of OGD for the bilinear problem can be written as

$$\begin{aligned} \mathbf{x}_{k+1} &= \mathbf{x}_k - 2\eta \mathbf{B} \mathbf{y}_k + \eta \mathbf{B} \mathbf{y}_{k-1}, \\ \mathbf{y}_{k+1} &= \mathbf{y}_k + 2\eta \mathbf{B}^\top \mathbf{x}_k + \eta \mathbf{B}^\top \mathbf{x}_{k-1}. \end{aligned}$$

The update for the variable  $\mathbf{x}$  can be written as an approximate variant of the PP update as follows

$$\begin{aligned} \mathbf{x}_{k+1} &= (\mathbf{I} + \eta^2 \mathbf{B} \mathbf{B}^\top)^{-1} (\mathbf{x}_k - \eta \mathbf{B} \mathbf{y}_k) \\ &\quad - [(\mathbf{x}_k - 2\eta \mathbf{B} \mathbf{y}_k + \eta \mathbf{B} \mathbf{y}_{k-1}) - ((\mathbf{I} + \eta^2 \mathbf{B} \mathbf{B}^\top)^{-1} (\mathbf{x}_k - \eta \mathbf{B} \mathbf{y}_k))] \\ &= (\mathbf{I} + \eta^2 \mathbf{B} \mathbf{B}^\top)^{-1} (\mathbf{x}_k - \eta \mathbf{B} \mathbf{y}_k) \\ &\quad - [(-\eta \mathbf{B} \mathbf{y}_k + \eta \mathbf{B} \mathbf{y}_{k-1} + \eta^2 \mathbf{B} \mathbf{B}^\top \mathbf{x}_k - \eta^3 \mathbf{B} \mathbf{B}^\top \mathbf{B} \mathbf{y}_k) + \mathbf{E}_x (\mathbf{x}_k - \eta \mathbf{B} \mathbf{y}_k)] \end{aligned} \quad (61)$$

Therefore, the error between the OGD and Proximal updates for the variable  $\mathbf{x}$  is given by

$$(-\eta \mathbf{B} \mathbf{y}_k + \eta \mathbf{B} \mathbf{y}_{k-1} + \eta^2 \mathbf{B} \mathbf{B}^\top \mathbf{x}_k - \eta^3 \mathbf{B} \mathbf{B}^\top \mathbf{B} \mathbf{y}_k) + \mathbf{E}_x (\mathbf{x}_k - \eta \mathbf{B} \mathbf{y}_k) \quad (62)$$

We first derive an upper bound for the term in the first parentheses  $(-\eta \mathbf{B} \mathbf{y}_k + \eta \mathbf{B} \mathbf{y}_{k-1} + \eta^2 \mathbf{B} \mathbf{B}^\top \mathbf{x}_k - \eta^3 \mathbf{B} \mathbf{B}^\top \mathbf{B} \mathbf{y}_k)$ .

Using the OGD update, we have:

$$\begin{aligned} -\eta \mathbf{B} \mathbf{y}_k + \eta \mathbf{B} \mathbf{y}_{k-1} &= -\eta \mathbf{B} (\mathbf{y}_k - \mathbf{y}_{k-1}) \\ &= -\eta \mathbf{B} (2\eta \mathbf{B}^\top \mathbf{x}_{k-1} - \eta \mathbf{B}^\top \mathbf{x}_{k-2}) \end{aligned} \quad (63)$$

Therefore, we can write

$$\begin{aligned}
 & (-\eta\mathbf{B}\mathbf{y}_k + \eta\mathbf{B}\mathbf{y}_{k-1} + \eta^2\mathbf{B}\mathbf{B}^\top\mathbf{x}_k - \eta^3\mathbf{B}\mathbf{B}^\top\mathbf{B}\mathbf{y}_k) \\
 &= (-2\eta^2\mathbf{B}\mathbf{B}^\top\mathbf{x}_{k-1} + \eta^2\mathbf{B}\mathbf{B}^\top\mathbf{x}_{k-2} + \eta^2\mathbf{B}\mathbf{B}^\top\mathbf{x}_k - \eta^3\mathbf{B}\mathbf{B}^\top\mathbf{B}\mathbf{y}_k) \\
 &= (\eta^2\mathbf{B}\mathbf{B}^\top\mathbf{x}_k - \eta^2\mathbf{B}\mathbf{B}^\top\mathbf{x}_{k-1} - \eta^2\mathbf{B}\mathbf{B}^\top\mathbf{x}_{k-1} + \eta^2\mathbf{B}\mathbf{B}^\top\mathbf{x}_{k-2} - \eta^3\mathbf{B}\mathbf{B}^\top\mathbf{B}\mathbf{y}_k)
 \end{aligned}$$

Once again, using the OGDA updates for  $(\mathbf{x}_k - \mathbf{x}_{k-1})$  and  $(\mathbf{x}_{k-1} - \mathbf{x}_{k-2})$ , we have

$$\begin{aligned}
 & (\eta^2\mathbf{B}\mathbf{B}^\top\mathbf{x}_k - \eta^2\mathbf{B}\mathbf{B}^\top\mathbf{x}_{k-1} - \eta^2\mathbf{B}\mathbf{B}^\top\mathbf{x}_{k-1} + \eta^2\mathbf{B}\mathbf{B}^\top\mathbf{x}_{k-2} - \eta^3\mathbf{B}\mathbf{B}^\top\mathbf{B}\mathbf{y}_k) \\
 &= (-2\eta^3\mathbf{B}\mathbf{B}^\top\mathbf{B}\mathbf{y}_{k-1} + 3\eta^3\mathbf{B}\mathbf{B}^\top\mathbf{B}\mathbf{y}_{k-2} - \eta^3\mathbf{B}\mathbf{B}^\top\mathbf{B}\mathbf{y}_{k-3} - \eta^3\mathbf{B}\mathbf{B}^\top\mathbf{B}\mathbf{y}_k) \\
 &= -\eta^3\mathbf{B}\mathbf{B}^\top\mathbf{B}(\mathbf{y}_k + 2\mathbf{y}_{k-1} - 3\mathbf{y}_{k-2} + \mathbf{y}_{k-3})
 \end{aligned} \tag{64}$$

Therefore, considering the expressions in (62) and (64) the error between the updates of OGDA and PP for the variable  $\mathbf{x}$  can be written as

$$\begin{aligned}
 & (\mathbf{x}_k - 2\eta\mathbf{B}\mathbf{y}_k + \eta\mathbf{B}\mathbf{y}_{k-1}) - ((\mathbf{I} + \eta^2\mathbf{B}\mathbf{B}^\top)^{-1}(\mathbf{x}_k - \eta\mathbf{B}\mathbf{y}_k)) \\
 &= \mathbf{E}_x(\mathbf{x}_k - \eta\mathbf{B}\mathbf{y}_k) - \eta^3\mathbf{B}\mathbf{B}^\top\mathbf{B}(\mathbf{y}_k + 2\mathbf{y}_{k-1} - 3\mathbf{y}_{k-2} + \mathbf{y}_{k-3})
 \end{aligned} \tag{65}$$

We apply the same argument for the update of the variable  $\mathbf{y}$ . Combining these results we obtain that the update of OGDA can be written as

$$\begin{aligned}
 \mathbf{x}_{k+1} &= (\mathbf{I} + \eta^2\mathbf{B}\mathbf{B}^\top)^{-1}(\mathbf{x}_k - \eta\mathbf{B}\mathbf{y}_k) + \mathbf{E}_x(\mathbf{x}_k - \eta\mathbf{B}\mathbf{y}_k) \\
 &\quad - \eta^3\mathbf{B}\mathbf{B}^\top\mathbf{B}(\mathbf{y}_k + 2\mathbf{y}_{k-1} - 3\mathbf{y}_{k-2} + \mathbf{y}_{k-3}) \\
 \mathbf{y}_{k+1} &= (\mathbf{I} + \eta^2\mathbf{B}^\top\mathbf{B})^{-1}(\mathbf{y}_k + \eta\mathbf{B}^\top\mathbf{x}_k) + \mathbf{E}_y(\mathbf{y}_k + \eta\mathbf{B}^\top\mathbf{x}_k) \\
 &\quad + \eta^3\mathbf{B}^\top\mathbf{B}\mathbf{B}^\top(\mathbf{x}_k + 2\mathbf{x}_{k-1} - 3\mathbf{x}_{k-2} + \mathbf{x}_{k-3})
 \end{aligned} \tag{66}$$

As in the proof of Theorem 1, we define  $\mathbf{Q}_x = (\mathbf{I} + \eta^2\mathbf{B}\mathbf{B}^\top)^{-1}$  and  $\mathbf{Q}_y = (\mathbf{I} + \eta^2\mathbf{B}^\top\mathbf{B})^{-1}$ . Then, we can show that

$$\begin{aligned}
 \|\mathbf{x}_{k+1}\|^2 &\leq (\mathbf{x}_k - \eta\mathbf{B}\mathbf{y}_k)^\top \mathbf{Q}_x^2 (\mathbf{x}_k - \eta\mathbf{B}\mathbf{y}_k) \\
 &\quad + \|\mathbf{E}_x(\mathbf{x}_k - \eta\mathbf{B}\mathbf{y}_k) - \eta^3\mathbf{B}\mathbf{B}^\top\mathbf{B}(\mathbf{y}_k + 2\mathbf{y}_{k-1} - 3\mathbf{y}_{k-2} + \mathbf{y}_{k-3})\|^2 \\
 &\quad + 2(\mathbf{x}_k - \eta\mathbf{B}\mathbf{y}_k)^\top \mathbf{Q}_x (\mathbf{E}_x(\mathbf{x}_k - \eta\mathbf{B}\mathbf{y}_k) \\
 &\quad - \eta^3\mathbf{B}\mathbf{B}^\top\mathbf{B}(\mathbf{y}_k + 2\mathbf{y}_{k-1} - 3\mathbf{y}_{k-2} + \mathbf{y}_{k-3})) \\
 \|\mathbf{y}_{k+1}\|^2 &\leq (\mathbf{y}_k + \eta\mathbf{B}^\top\mathbf{x}_k)^\top \mathbf{Q}_y^2 (\mathbf{y}_k + \eta\mathbf{B}^\top\mathbf{x}_k) \\
 &\quad + \|\mathbf{E}_y(\mathbf{y}_k + \eta\mathbf{B}^\top\mathbf{x}_k) + \eta^3\mathbf{B}^\top\mathbf{B}\mathbf{B}^\top(\mathbf{x}_k + 2\mathbf{x}_{k-1} - 3\mathbf{x}_{k-2} + \mathbf{x}_{k-3})\|^2 \\
 &\quad + 2(\mathbf{y}_k + \eta\mathbf{B}^\top\mathbf{x}_k)^\top \mathbf{Q}_y (\mathbf{E}_y(\mathbf{y}_k + \eta\mathbf{B}^\top\mathbf{x}_k) \\
 &\quad + \eta^3\mathbf{B}^\top\mathbf{B}\mathbf{B}^\top(\mathbf{x}_k + 2\mathbf{x}_{k-1} - 3\mathbf{x}_{k-2} + \mathbf{x}_{k-3}))
 \end{aligned} \tag{67}$$

On summing the two sides, we have:

$$\begin{aligned}
 & \|\mathbf{x}_{k+1}\|^2 + \|\mathbf{y}_{k+1}\|^2 \\
 &\leq (\mathbf{x}_k - \eta\mathbf{B}\mathbf{y}_k)^\top \mathbf{Q}_x^2 (\mathbf{x}_k - \eta\mathbf{B}\mathbf{y}_k) + (\mathbf{y}_k + \eta\mathbf{B}^\top\mathbf{x}_k)^\top \mathbf{Q}_y^2 (\mathbf{y}_k + \eta\mathbf{B}^\top\mathbf{x}_k) \\
 &\quad + \|\mathbf{E}_x(\mathbf{x}_k - \eta\mathbf{B}\mathbf{y}_k) - \eta^3\mathbf{B}\mathbf{B}^\top\mathbf{B}(\mathbf{y}_k + 2\mathbf{y}_{k-1} - 3\mathbf{y}_{k-2} + \mathbf{y}_{k-3})\|^2 \\
 &\quad + \|\mathbf{E}_y(\mathbf{y}_k + \eta\mathbf{B}^\top\mathbf{x}_k) + \eta^3\mathbf{B}^\top\mathbf{B}\mathbf{B}^\top(\mathbf{x}_k + 2\mathbf{x}_{k-1} - 3\mathbf{x}_{k-2} + \mathbf{x}_{k-3})\|^2 \\
 &\quad + 2(\mathbf{x}_k - \eta\mathbf{B}\mathbf{y}_k)^\top \mathbf{Q}_x (\mathbf{E}_x(\mathbf{x}_k - \eta\mathbf{B}\mathbf{y}_k) - \eta^3\mathbf{B}\mathbf{B}^\top\mathbf{B}(\mathbf{y}_k + 2\mathbf{y}_{k-1} - 3\mathbf{y}_{k-2} + \mathbf{y}_{k-3})) \\
 &\quad + 2(\mathbf{y}_k + \eta\mathbf{B}^\top\mathbf{x}_k)^\top \mathbf{Q}_y (\mathbf{E}_y(\mathbf{y}_k + \eta\mathbf{B}^\top\mathbf{x}_k) + \eta^3\mathbf{B}^\top\mathbf{B}\mathbf{B}^\top(\mathbf{x}_k + 2\mathbf{x}_{k-1} - 3\mathbf{x}_{k-2} + \mathbf{x}_{k-3}))
 \end{aligned} \tag{68}$$

Define  $r_k = \|\mathbf{x}_k\|^2 + \|\mathbf{y}_k\|^2$ . We have:

$$r_{k+1} \leq \max_{i \in \{k, k-1, k-2, k-3\}} \left[ \begin{aligned} & \mathbf{x}_i^\top (\mathbf{Q}_x + 2\mathbf{E}_x^2 + 2\eta^2 \mathbf{B}\mathbf{B}^\top \mathbf{E}_x^2 + 30\eta^6 (\mathbf{B}\mathbf{B}^\top)^3 + 2\mathbf{Q}_x \mathbf{E}_x \\ & + 2\eta^2 \mathbf{B}\mathbf{Q}_y \mathbf{E}_y \mathbf{B}^\top - 20\eta^3 \mathbf{B}^\top \mathbf{B}\mathbf{B}^\top \mathbf{Q}_x) \mathbf{x}_i + \mathbf{y}_i^\top (\mathbf{Q}_y + 2\mathbf{E}_y^2 \\ & + 2\eta^2 \mathbf{B}\mathbf{B}^\top \mathbf{E}_y^2 + 30\eta^6 (\mathbf{B}\mathbf{B}^\top)^3 + 2\mathbf{Q}_y \mathbf{E}_y + 2\eta^2 \mathbf{B}\mathbf{Q}_x \mathbf{E}_x \mathbf{B}^\top \\ & - 20\eta^3 \mathbf{B}^\top \mathbf{B}\mathbf{B}^\top \mathbf{Q}_y) \mathbf{y}_i \end{aligned} \right] \quad (69)$$

And for  $\eta = \frac{1}{40\sqrt{\lambda_{\max}(\mathbf{B}^\top \mathbf{B})}}$ .

$$\begin{aligned} r_{k+1} & \leq \max_{i \in \{k, k-1, k-2, k-3\}} \left[ \mathbf{x}_i^\top \left( \mathbf{I} - \frac{1}{2}\eta^2 \mathbf{B}\mathbf{B}^\top + \frac{1}{4}\eta^2 \mathbf{B}\mathbf{B}^\top \right) \mathbf{x}_i + \mathbf{y}_i^\top \left( \mathbf{I} - \frac{1}{2}\eta^2 \mathbf{B}^\top \mathbf{B} + \frac{1}{4}\eta^2 \mathbf{B}^\top \mathbf{B} \right) \mathbf{y}_i \right] \\ & \leq \left( 1 - \frac{1}{800\kappa} \right) \max\{r_k, r_{k-1}, r_{k-2}, r_{k-3}\} \end{aligned} \quad (70)$$

### 8.5 Proof of Theorem 4

We define  $\mathbf{z} = [\mathbf{x}; \mathbf{y}]$  and  $F(\mathbf{z}) = [\nabla_{\mathbf{x}} f(\mathbf{x}, \mathbf{y}); -\nabla_{\mathbf{y}} f(\mathbf{x}, \mathbf{y})]$ . Note that Assumption 3 gives us  $\|F(\mathbf{z}_1) - F(\mathbf{z}_2)\| \leq 2L\|\mathbf{z}_1 - \mathbf{z}_2\|$ . The OGD updates can be compactly written as:

$$\mathbf{z}_{k+1} = \mathbf{z}_k - 2\eta F(\mathbf{z}_k) + \eta F(\mathbf{z}_{k-1}) \quad (71)$$

We write the update in terms of the Proximal Point method with an error  $\varepsilon_k = \eta(F(\mathbf{z}_{k+1}) - 2F(\mathbf{z}_k) + F(\mathbf{z}_{k-1}))$  as follows:

$$\mathbf{z}_{k+1} = \mathbf{z}_k - \eta F(\mathbf{z}_{k+1}) + \varepsilon_k \quad (72)$$

On rearranging Equation (72) and using the fact that  $F(\mathbf{z}^*) = 0$ , where  $\mathbf{z}^* = [\mathbf{x}^*; \mathbf{y}^*]$ , we get:

$$\eta(F(\mathbf{z}_{k+1}) - F(\mathbf{z}^*)) = \mathbf{z}_k - \mathbf{z}_{k+1} + \eta(F(\mathbf{z}_{k+1}) - F(\mathbf{z}_k)) - \eta(F(\mathbf{z}_k) - F(\mathbf{z}_{k-1})) \quad (73)$$

On squaring Equation (73) and using Young's inequality, we get:

$$\eta^2 \|F(\mathbf{z}_{k+1}) - F(\mathbf{z}^*)\|^2 \leq 3\|\mathbf{z}_{k+1} - \mathbf{z}_k\|^2 + 3\eta^2 (2L)^2 \|\mathbf{z}_{k+1} - \mathbf{z}_k\|^2 + 3\eta^2 (2L)^2 \|\mathbf{z}_k - \mathbf{z}_{k-1}\|^2 \quad (74)$$

Now, using strong convexity, and substituting  $\eta = 1/8L$ , we get:

$$\frac{\mu^2}{64L^2} \|\mathbf{z}_{k+1} - \mathbf{z}^*\|^2 \leq 4 \max\{\|\mathbf{z}_{k+1} - \mathbf{z}_k\|^2, \|\mathbf{z}_k - \mathbf{z}_{k-1}\|^2\} \quad (75)$$

The following part of the proof is inspired by the result of Theorem 1 of Gidel et al. (2019). For OGD iterates, we have:

$$\mathbf{z}_k - \eta(F(\mathbf{z}_k) - F(\mathbf{z}_{k-1})) = \mathbf{z}_{k-1} - \eta(F(\mathbf{z}_{k-1}) - F(\mathbf{z}_{k-2})) - \eta F(\mathbf{z}_k) \quad (76)$$

On subtracting  $\mathbf{z}^*$  from both sides and squaring, we have:

$$\begin{aligned} & \|\mathbf{z}_k - \eta(F(\mathbf{z}_k) - F(\mathbf{z}_{k-1})) - \mathbf{z}^*\|^2 \\ & = \|\mathbf{z}_{k-1} - \eta(F(\mathbf{z}_{k-1}) - F(\mathbf{z}_{k-2})) - \mathbf{z}^*\|^2 + \eta^2 \|F(\mathbf{z}_k)\|^2 \\ & \quad - 2\eta \langle F(\mathbf{z}_k), \mathbf{z}_{k-1} - \eta(F(\mathbf{z}_{k-1}) - F(\mathbf{z}_{k-2})) - \mathbf{z}^* \rangle \\ & = \|\mathbf{z}_{k-1} - \eta(F(\mathbf{z}_{k-1}) - F(\mathbf{z}_{k-2})) - \mathbf{z}^*\|^2 - 2\eta \langle F(\mathbf{z}_k), \mathbf{z}_k - \mathbf{z}^* \rangle \\ & \quad - 2\langle \eta F(\mathbf{z}_k), \eta F(\mathbf{z}_{k-1}) \rangle + \eta^2 \|F(\mathbf{z}_k)\|^2 \\ & = \|\mathbf{z}_{k-1} - \eta(F(\mathbf{z}_{k-1}) - F(\mathbf{z}_{k-2})) - \mathbf{z}^*\|^2 - 2\eta \langle F(\mathbf{z}_k), \mathbf{z}_k - \mathbf{z}^* \rangle \\ & \quad + \eta^2 \|F(\mathbf{z}_k) - F(\mathbf{z}_{k-1})\|^2 - \eta^2 \|F(\mathbf{z}_{k-1})\|^2 \\ & \leq \|\mathbf{z}_{k-1} - \eta(F(\mathbf{z}_{k-1}) - F(\mathbf{z}_{k-2})) - \mathbf{z}^*\|^2 - 2\eta \langle F(\mathbf{z}_k), \mathbf{z}_k - \mathbf{z}^* \rangle \\ & \quad + \eta^2 (2L)^2 \|\mathbf{z}_k - \mathbf{z}_{k-1}\|^2 - \eta^2 \|F(\mathbf{z}_{k-1})\|^2 \end{aligned} \quad (77)$$

However, since:

$$\langle F(\mathbf{z}_k), \mathbf{z}_k - \mathbf{z}^* \rangle \geq \mu \|\mathbf{z}_k - \mathbf{z}^*\|^2 \quad (78)$$

and using Young's inequality we have

$$\|\mathbf{z}_k - \mathbf{z}^*\|^2 \leq \frac{1}{2} \|\mathbf{z}_{k-1} - \eta(F(\mathbf{z}_{k-1}) - F(\mathbf{z}_{k-2})) - \mathbf{z}^*\|^2 - \|\eta F(\mathbf{z}_{k-1})\|^2 \quad (79)$$

Substituting Equations (78) and (79) in Equation (77), we have:

$$\begin{aligned} & \eta\mu \left( \|\mathbf{z}_{k-1} - \eta(F(\mathbf{z}_{k-1}) - F(\mathbf{z}_{k-2})) - \mathbf{z}^*\|^2 - 2\eta^2 \|F(\mathbf{z}_{k-1})\|^2 \right) \\ & \leq \|\mathbf{z}_{k-1} - \eta(F(\mathbf{z}_{k-1}) - F(\mathbf{z}_{k-2})) - \mathbf{z}^*\|^2 - \|\mathbf{z}_k - \eta(F(\mathbf{z}_k) - F(\mathbf{z}_{k-1})) - \mathbf{z}^*\|^2 \\ & \quad + \eta^2 (2L)^2 \|\mathbf{z}_k - \mathbf{z}_{k-1}\|^2 - \eta^2 \|F(\mathbf{z}_{k-1})\|^2 \end{aligned} \quad (80)$$

which on rearranging gives:

$$\begin{aligned} & \|\mathbf{z}_k - \eta(F(\mathbf{z}_k) - F(\mathbf{z}_{k-1})) - \mathbf{z}^*\|^2 \\ & \leq (1 - \eta\mu) \|\mathbf{z}_{k-1} - \eta(F(\mathbf{z}_{k-1}) - F(\mathbf{z}_{k-2})) - \mathbf{z}^*\|^2 + \eta^2 (2L)^2 \|\mathbf{z}_k - \mathbf{z}_{k-1}\|^2 \\ & \quad - \eta^2 (1 - 2\eta\mu) \|F(\mathbf{z}_{k-1})\|^2 \end{aligned} \quad (81)$$

However, for the OGDA iterates:

$$\begin{aligned} \|\mathbf{z}_k - \mathbf{z}_{k-1}\|^2 &= \eta^2 \|F(\mathbf{z}_{k-1} + F(\mathbf{z}_{k-1}) - F(\mathbf{z}_{k-2}))\|^2 \\ &\leq 2\eta^2 \|F(\mathbf{z}_{k-1})\|^2 + 2\eta^2 \|F(\mathbf{z}_{k-1}) - F(\mathbf{z}_{k-2})\|^2 \\ &\leq 2\eta^2 \|F(\mathbf{z}_{k-1})\|^2 + 2\eta^2 (2L)^2 \|\mathbf{z}_{k-1} - \mathbf{z}_{k-2}\|^2 \end{aligned} \quad (82)$$

which can be written as:

$$\|\mathbf{z}_k - \mathbf{z}_{k-1}\|^2 \leq 4\eta^2 \|F(\mathbf{z}_{k-1})\|^2 + 4\eta^2 (2L)^2 \|\mathbf{z}_{k-1} - \mathbf{z}_{k-2}\|^2 - \|\mathbf{z}_k - \mathbf{z}_{k-1}\|^2 \quad (83)$$

Substituting Equation (83) in Equation (81), we get:

$$\begin{aligned} & \|\mathbf{z}_k - \eta(F(\mathbf{z}_k) - F(\mathbf{z}_{k-1})) - \mathbf{z}^*\|^2 + \eta^2 L^2 \|\mathbf{z}_k - \mathbf{z}_{k-1}\|^2 \\ & \leq (1 - \eta\mu) \|\mathbf{z}_{k-1} - \eta(F(\mathbf{z}_{k-1}) - F(\mathbf{z}_{k-2})) - \mathbf{z}^*\|^2 + 4\eta^4 (2L)^4 \|\mathbf{z}_{k-1} - \mathbf{z}_{k-2}\|^2 \\ & \quad - \eta^2 (1 - 2\eta\mu - 4\eta^2 (2L)^2) \|F(\mathbf{z}_{k-1})\|^2 \end{aligned} \quad (84)$$

For  $\eta \leq 1/8L$ , we have:  $1 - 2\eta\mu - 4\eta^2 (2L)^2 > 0$  and therefore, can ignore the last term, which gives us (for  $\eta \leq 1/8L$ )

$$\begin{aligned} & \|\mathbf{z}_k - \eta(F(\mathbf{z}_k) - F(\mathbf{z}_{k-1})) - \mathbf{z}^*\|^2 + \eta^2 (2L)^2 \|\mathbf{z}_k - \mathbf{z}_{k-1}\|^2 \\ & \leq (1 - \eta\mu) \|\mathbf{z}_{k-1} - \eta(F(\mathbf{z}_{k-1}) - F(\mathbf{z}_{k-2})) - \mathbf{z}^*\|^2 + 4\eta^4 (2L)^4 \|\mathbf{z}_{k-1} - \mathbf{z}_{k-2}\|^2 \end{aligned} \quad (85)$$

since  $\eta \leq 1/8L$ , we have  $(1 - \eta\mu) \geq 4\eta^2 (2L)^2$ , which gives:

$$\begin{aligned} & \|\mathbf{z}_k - \eta(F(\mathbf{z}_k) - F(\mathbf{z}_{k-1})) - \mathbf{z}^*\|^2 + \eta^2 (2L)^2 \|\mathbf{z}_k - \mathbf{z}_{k-1}\|^2 \\ & \leq (1 - \eta\mu) \left( \|\mathbf{z}_{k-1} - \eta(F(\mathbf{z}_{k-1}) - F(\mathbf{z}_{k-2})) - \mathbf{z}^*\|^2 + \eta^2 (2L)^2 \|\mathbf{z}_{k-1} - \mathbf{z}_{k-2}\|^2 \right) \end{aligned} \quad (86)$$

which gives us:

$$\|\mathbf{z}_k - \eta(F(\mathbf{z}_k) - F(\mathbf{z}_{k-1})) - \mathbf{z}^*\|^2 + \eta^2 (2L)^2 \|\mathbf{z}_k - \mathbf{z}_{k-1}\|^2 \leq (1 - \eta\mu)^k (\|\mathbf{z}_0 - \mathbf{z}^*\|^2) \quad (87)$$

in particular, for  $\eta = \frac{1}{8L}$ :

$$\|\mathbf{z}_k - \mathbf{z}_{k-1}\|^2 \leq 64 \left(1 - \frac{\mu}{8L}\right)^k (\|\mathbf{z}_0 - \mathbf{z}^*\|^2) \quad (88)$$

Substituting Equation (88) back in Equation (75), we get:

$$\|\mathbf{z}_{k+1} - \mathbf{z}^*\|^2 \leq \left(1 - \frac{\mu}{8L}\right)^k \times (16384\kappa^2 \|\mathbf{z}_0 - \mathbf{z}^*\|^2) \quad (89)$$

On defining  $\hat{r}_0 = 16384\kappa^2 \|\mathbf{z}_0 - \mathbf{z}^*\|^2$ , we have:

$$\|\mathbf{z}_{k+1} - \mathbf{z}^*\|^2 \leq \left(1 - \frac{\mu}{8L}\right)^k \hat{r}_0. \quad (90)$$



## 8.6 Proof of Theorem 5

The generalized OGD method for bilinear problems is given by:

$$\begin{aligned}\mathbf{x}_{k+1} &= \mathbf{x}_k - (\alpha + \beta)\mathbf{B}\mathbf{y}_k + \beta\mathbf{B}\mathbf{y}_{k-1} \\ \mathbf{y}_{k+1} &= \mathbf{y}_k + (\alpha + \beta)\mathbf{B}\mathbf{y}_k - \beta\mathbf{B}\mathbf{y}_{k-1}\end{aligned}$$

We compare this with the Proximal Point (PP) method with stepsize  $\alpha$ . The proof follows long the exact same lines as the proof of Theorem 3.

We define the following symmetric matrices

$$\begin{aligned}\mathbf{E}_x &= \mathbf{I} - \alpha^2\mathbf{B}\mathbf{B}^\top - (\mathbf{I} + \alpha^2\mathbf{B}\mathbf{B}^\top)^{-1}, \\ \mathbf{E}_y &= \mathbf{I} - \alpha^2\mathbf{B}^\top\mathbf{B} - (\mathbf{I} + \alpha^2\mathbf{B}^\top\mathbf{B})^{-1}.\end{aligned}$$

We rewrite the properties of  $\mathbf{E}_x$  and  $\mathbf{E}_y$  which are

$$\|\mathbf{E}_x\|, \|\mathbf{E}_y\| \leq \frac{\alpha^4\lambda_{\max}(\mathbf{B}^\top\mathbf{B})^2}{1 - \alpha^2\sqrt{\lambda_{\max}^2(\mathbf{B}^\top\mathbf{B})}} = e \quad (91)$$

$$\mathbf{E}_x\mathbf{B} = \mathbf{B}\mathbf{E}_y \quad (92)$$

$$\mathbf{E}_y\mathbf{B}^\top = \mathbf{B}^\top\mathbf{E}_x \quad (93)$$

Therefore, the error between the OGD and Proximal updates for the variable  $\mathbf{x}$  is given by

$$(-\beta\mathbf{B}\mathbf{y}_k + \beta\mathbf{B}\mathbf{y}_{k-1} + \alpha^2\mathbf{B}\mathbf{B}^\top\mathbf{x}_k - \alpha^3\mathbf{B}\mathbf{B}^\top\mathbf{B}\mathbf{y}_k) + \mathbf{E}_x(\mathbf{x}_k - \alpha\mathbf{B}\mathbf{y}_k) \quad (94)$$

We first derive an upper bound for the term in the first parentheses  $(-\beta\mathbf{B}\mathbf{y}_k + \beta\mathbf{B}\mathbf{y}_{k-1} + \alpha^2\mathbf{B}\mathbf{B}^\top\mathbf{x}_k - \alpha^3\mathbf{B}\mathbf{B}^\top\mathbf{B}\mathbf{y}_k)$ .

Using the generalized OGD update, we have:

$$\begin{aligned}-\beta\mathbf{B}\mathbf{y}_k + \beta\mathbf{B}\mathbf{y}_{k-1} &= -\beta\mathbf{B}(\mathbf{y}_k - \mathbf{y}_{k-1}) \\ &= -\beta\mathbf{B}((\alpha + \beta)\mathbf{B}^\top\mathbf{x}_{k-1} - \beta\mathbf{B}^\top\mathbf{x}_{k-2})\end{aligned} \quad (95)$$

Therefore, we can write

$$\begin{aligned}(-\beta\mathbf{B}\mathbf{y}_k + \beta\mathbf{B}\mathbf{y}_{k-1} + \alpha^2\mathbf{B}\mathbf{B}^\top\mathbf{x}_k - \alpha^3\mathbf{B}\mathbf{B}^\top\mathbf{B}\mathbf{y}_k) \\ = (\alpha^2\mathbf{B}\mathbf{B}^\top\mathbf{x}_k - \alpha\beta\mathbf{B}\mathbf{B}^\top\mathbf{x}_{k-1} - \beta^2\mathbf{B}\mathbf{B}^\top\mathbf{x}_{k-1} + \beta^2\mathbf{B}\mathbf{B}^\top\mathbf{x}_{k-2} - \alpha^3\mathbf{B}\mathbf{B}^\top\mathbf{B}\mathbf{y}_k)\end{aligned}$$

Once again, using the generalized OGD updates for  $(\mathbf{x}_k - \mathbf{x}_{k-1})$  and  $(\mathbf{x}_{k-1} - \mathbf{x}_{k-2})$ , we have

$$\begin{aligned}(\alpha^2\mathbf{B}\mathbf{B}^\top\mathbf{x}_k - \alpha\beta\mathbf{B}\mathbf{B}^\top\mathbf{x}_{k-1} - \beta^2\mathbf{B}\mathbf{B}^\top\mathbf{x}_{k-1} + \beta^2\mathbf{B}\mathbf{B}^\top\mathbf{x}_{k-2} - \alpha^3\mathbf{B}\mathbf{B}^\top\mathbf{B}\mathbf{y}_k) \\ = \alpha(\alpha - \beta)\mathbf{B}\mathbf{B}^\top\mathbf{x}_k - \alpha\beta(\alpha + \beta)\mathbf{B}\mathbf{B}^\top\mathbf{B}\mathbf{y}_{k-1} + \alpha\beta^2\mathbf{B}\mathbf{B}^\top\mathbf{B}\mathbf{y}_{k-2} \\ + \beta^2(\alpha + \beta)\mathbf{B}\mathbf{B}^\top\mathbf{B}\mathbf{y}_{k-2} - \beta^3\mathbf{B}\mathbf{B}^\top\mathbf{B}\mathbf{y}_{k-3} - \alpha^3\mathbf{B}\mathbf{B}^\top\mathbf{B}\mathbf{y}_k \\ = \alpha(\alpha - \beta)\mathbf{B}\mathbf{B}^\top\mathbf{x}_k - \alpha\beta(\alpha + \beta)\mathbf{B}\mathbf{B}^\top\mathbf{B}\mathbf{y}_{k-1} + \beta^2(2\alpha + \beta)\mathbf{B}\mathbf{B}^\top\mathbf{B}\mathbf{y}_{k-2} \\ - \beta^3\mathbf{B}\mathbf{B}^\top\mathbf{B}\mathbf{y}_{k-3} - \alpha^3\mathbf{B}\mathbf{B}^\top\mathbf{B}\mathbf{y}_k\end{aligned} \quad (96)$$

Therefore, considering the expressions in (94) and (96) the error between the updates of OGD and PP for the variable  $\mathbf{x}$  can be written as

$$\begin{aligned}(\mathbf{x}_k - (\alpha + \beta)\mathbf{B}\mathbf{y}_k + \beta\mathbf{B}\mathbf{y}_{k-1}) - ((\mathbf{I} + \alpha^2\mathbf{B}\mathbf{B}^\top)^{-1}(\mathbf{x}_k - \alpha\mathbf{B}\mathbf{y}_k)) \\ = \mathbf{E}_x(\mathbf{x}_k - \alpha\mathbf{B}\mathbf{y}_k) + \alpha(\alpha - \beta)\mathbf{B}\mathbf{B}^\top\mathbf{x}_k - \alpha\beta(\alpha + \beta)\mathbf{B}\mathbf{B}^\top\mathbf{B}\mathbf{y}_{k-1} \\ + \beta^2(2\alpha + \beta)\mathbf{B}\mathbf{B}^\top\mathbf{B}\mathbf{y}_{k-2} - \beta^3\mathbf{B}\mathbf{B}^\top\mathbf{B}\mathbf{y}_{k-3} - \alpha^3\mathbf{B}\mathbf{B}^\top\mathbf{B}\mathbf{y}_k\end{aligned} \quad (97)$$

Now, the convergence proof follows along the same lines as the proof of Theorem 3. We set  $\eta = \max\{\alpha, \beta\}$ , and we need the additional assumption:

$$|\alpha - \beta| \leq \mathcal{O}(\eta^3/\alpha) \quad (98)$$

due to the presence of the term  $\alpha(\alpha - \beta)\mathbf{B}\mathbf{B}^\top \mathbf{x}_k$ , Let

$$\alpha - K\alpha^2 \leq \beta \leq \alpha \quad (99)$$

On making these substitutions, we get the same result as Theorem 3.

## 8.7 Proof of Proposition 2

The Extragradient updates can be written as

$$\begin{aligned} \mathbf{x}_{k+1} &= \mathbf{x}_k - \eta \nabla_{\mathbf{x}} f(\mathbf{x}_k - \eta \nabla_{\mathbf{x}} f(\mathbf{x}_k, \mathbf{y}_k), \mathbf{y}_k + \eta \nabla_{\mathbf{y}} f(\mathbf{x}_k, \mathbf{y}_k)) \\ \mathbf{y}_{k+1} &= \mathbf{y}_k + \eta \nabla_{\mathbf{y}} f(\mathbf{x}_k - \eta \nabla_{\mathbf{x}} f(\mathbf{x}_k, \mathbf{y}_k), \mathbf{y}_k + \eta \nabla_{\mathbf{y}} f(\mathbf{x}_k, \mathbf{y}_k)) \end{aligned}$$

By writing the Taylor's expansion of  $\nabla_{\mathbf{x}} f$  we obtain that

$$\begin{aligned} &\nabla_{\mathbf{x}} f(\mathbf{x}_k - \eta \nabla_{\mathbf{x}} f(\mathbf{x}_k, \mathbf{y}_k), \mathbf{y}_k + \eta \nabla_{\mathbf{y}} f(\mathbf{x}_k, \mathbf{y}_k)) \\ &= \nabla_{\mathbf{x}} f(\mathbf{x}_k, \mathbf{y}_k) + \nabla_{\mathbf{xx}} f(\mathbf{x}_k, \mathbf{y}_k) [\mathbf{x}_k - \eta \nabla_{\mathbf{x}} f(\mathbf{x}_k, \mathbf{y}_k) - \mathbf{x}_k] \\ &\quad + \nabla_{\mathbf{xy}} f(\mathbf{x}_k, \mathbf{y}_k) [\mathbf{y}_k + \eta \nabla_{\mathbf{y}} f(\mathbf{x}_k, \mathbf{y}_k) - \mathbf{y}_k] + o(\eta) \\ &= \nabla_{\mathbf{x}} f(\mathbf{x}_k, \mathbf{y}_k) - \eta \nabla_{\mathbf{xx}} f(\mathbf{x}_k, \mathbf{y}_k) \nabla_{\mathbf{x}} f(\mathbf{x}_k, \mathbf{y}_k) + \eta \nabla_{\mathbf{xy}} f(\mathbf{x}_k, \mathbf{y}_k) \nabla_{\mathbf{y}} f(\mathbf{x}_k, \mathbf{y}_k) + o(\eta). \end{aligned} \quad (100)$$

Use this expression to write

$$\begin{aligned} \mathbf{x}_{k+1} &= \mathbf{x}_k - \eta \nabla_{\mathbf{x}} f(\mathbf{x}_k, \mathbf{y}_k) + \eta^2 \nabla_{\mathbf{xx}} f(\mathbf{x}_k, \mathbf{y}_k) \nabla_{\mathbf{x}} f(\mathbf{x}_k, \mathbf{y}_k) \\ &\quad - \eta^2 \nabla_{\mathbf{xy}} f(\mathbf{x}_k, \mathbf{y}_k) \nabla_{\mathbf{y}} f(\mathbf{x}_k, \mathbf{y}_k) + o(\eta^2). \end{aligned} \quad (101)$$

By following the same argument for  $\mathbf{y}$  we obtain

$$\begin{aligned} \mathbf{y}_{k+1} &= \mathbf{y}_k + \eta \nabla_{\mathbf{y}} f(\mathbf{x}_k, \mathbf{y}_k) + \eta^2 \nabla_{\mathbf{yy}} f(\mathbf{x}_k, \mathbf{y}_k) \nabla_{\mathbf{y}} f(\mathbf{x}_k, \mathbf{y}_k) \\ &\quad - \eta^2 \nabla_{\mathbf{yx}} f(\mathbf{x}_k, \mathbf{y}_k) \nabla_{\mathbf{x}} f(\mathbf{x}_k, \mathbf{y}_k) + o(\eta^2) \end{aligned} \quad (102)$$

Now we find a second order approximation for the Proximal Point Method. Note that the update of the proximal point method for variable  $\mathbf{x}$  can be written as

$$\begin{aligned} \mathbf{x}_{k+1} &= \mathbf{x}_k - \eta \nabla_{\mathbf{x}} f(\mathbf{x}_{k+1}, \mathbf{y}_{k+1}) \\ &= \mathbf{x}_k - \eta \nabla_{\mathbf{x}} f(\mathbf{x}_k - \eta \nabla_{\mathbf{x}} f(\mathbf{x}_{k+1}, \mathbf{y}_{k+1}), \mathbf{y}_k + \eta \nabla_{\mathbf{y}} f(\mathbf{x}_{k+1}, \mathbf{y}_{k+1})) \end{aligned} \quad (103)$$

where in the second equality we replaced  $\mathbf{x}_{k+1}$  and  $\mathbf{y}_{k+1}$  in the gradient with their updates. Hence, using Taylor's series we can show that

$$\begin{aligned} \mathbf{x}_{k+1} &= \mathbf{x}_k - \eta \nabla_{\mathbf{x}} f(\mathbf{x}_k, \mathbf{y}_k) + \eta^2 \nabla_{\mathbf{xx}} f(\mathbf{x}_k, \mathbf{y}_k) \nabla_{\mathbf{x}} f(\mathbf{x}_{k+1}, \mathbf{y}_{k+1}) \\ &\quad - \eta^2 \nabla_{\mathbf{xy}} f(\mathbf{x}_k, \mathbf{y}_k) \nabla_{\mathbf{y}} f(\mathbf{x}_{k+1}, \mathbf{y}_{k+1}) + o(\eta^2) \\ &= \mathbf{x}_k - \eta \nabla_{\mathbf{x}} f(\mathbf{x}_k, \mathbf{y}_k) + \eta^2 \nabla_{\mathbf{xx}} f(\mathbf{x}_k, \mathbf{y}_k) \nabla_{\mathbf{x}} f(\mathbf{x}_k, \mathbf{y}_k) \\ &\quad - \eta^2 \nabla_{\mathbf{xy}} f(\mathbf{x}_k, \mathbf{y}_k) \nabla_{\mathbf{y}} f(\mathbf{x}_k, \mathbf{y}_k) + o(\eta^2), \end{aligned} \quad (104)$$

where in the second equality we used the fact that  $\nabla_{\mathbf{x}} f(\mathbf{x}_{k+1}, \mathbf{y}_{k+1}) = \nabla_{\mathbf{x}} f(\mathbf{x}_k, \mathbf{y}_k) + \mathcal{O}(\eta)$  and  $\nabla_{\mathbf{y}} f(\mathbf{x}_{k+1}, \mathbf{y}_{k+1}) = \nabla_{\mathbf{y}} f(\mathbf{x}_k, \mathbf{y}_k) + \mathcal{O}(\eta)$ . Similarly, we find the approximation of the update of  $\mathbf{y}$  which leads to

$$\begin{aligned} \mathbf{y}_{k+1} &= \mathbf{y}_k + \eta \nabla_{\mathbf{y}} f(\mathbf{x}_k, \mathbf{y}_k) + \eta^2 \nabla_{\mathbf{yy}} f(\mathbf{x}_k, \mathbf{y}_k) \nabla_{\mathbf{y}} f(\mathbf{x}_k, \mathbf{y}_k) \\ &\quad - \eta^2 \nabla_{\mathbf{yx}} f(\mathbf{x}_k, \mathbf{y}_k) \nabla_{\mathbf{x}} f(\mathbf{x}_k, \mathbf{y}_k) + o(\eta^2). \end{aligned} \quad (105)$$

Comparing the expressions in (101) and (102) with the ones in (104) and (105) implies that the difference between the updates of PP and EG is at most  $o(\eta^2)$  and this completes the proof.

## 8.8 Proof of Theorem 6

Define the following symmetric error matrices

$$\mathbf{E}_x = \mathbf{I} - \eta^2 \mathbf{B} \mathbf{B}^\top - (\mathbf{I} + \eta^2 \mathbf{B} \mathbf{B}^\top)^{-1}, \quad \mathbf{E}_y = \mathbf{I} - \eta^2 \mathbf{B}^\top \mathbf{B} - (\mathbf{I} + \eta^2 \mathbf{B}^\top \mathbf{B})^{-1} \quad (106)$$

which are useful to characterize the difference between the updates of EG and PP for a bilinear problem. Note that we can bound the norms of  $\mathbf{E}_x$  and  $\mathbf{E}_y$  as

$$\begin{aligned} \|\mathbf{E}_x\| &\leq \eta^4 \sqrt{\lambda_{\max}(\mathbf{B} \mathbf{B}^\top)} + \eta^6 \sqrt{\lambda_{\max}(\mathbf{B} \mathbf{B}^\top)} + \dots \\ &= \frac{\eta^4 \lambda_{\max}(\mathbf{B} \mathbf{B}^\top)^2}{1 - \eta^2 \sqrt{\lambda_{\max}(\mathbf{B} \mathbf{B}^\top)}}, \end{aligned} \quad (107)$$

and similarly

$$\|\mathbf{E}_y\| \leq \frac{\eta^4 \lambda_{\max}(\mathbf{B}^\top \mathbf{B})^2}{1 - \eta^2 \sqrt{\lambda_{\max}(\mathbf{B}^\top \mathbf{B})}}. \quad (108)$$

Since  $\lambda_{\max}(\mathbf{B}^\top \mathbf{B}) = \lambda_{\max}(\mathbf{B} \mathbf{B}^\top)$ , we have:

$$\|\mathbf{E}_x\|, \|\mathbf{E}_y\| \leq \frac{\eta^4 \lambda_{\max}(\mathbf{B}^\top \mathbf{B})^2}{1 - \eta^2 \sqrt{\lambda_{\max}(\mathbf{B}^\top \mathbf{B})}} := e \quad (109)$$

Also, from Lemma 1 in the proof of Theorem 1, and the definitions of the error matrices in (106) it can be verified that

$$\mathbf{E}_x \mathbf{B} = \mathbf{B} \mathbf{E}_y \quad (110)$$

$$\mathbf{E}_y \mathbf{B}^\top = \mathbf{B}^\top \mathbf{E}_x \quad (111)$$

Moreover, using the definitions of  $\mathbf{E}_x$  and  $\mathbf{E}_y$  in (106), the EG updates can be written as

$$\mathbf{x}_{k+1} = (\mathbf{I} + \eta^2 \mathbf{B} \mathbf{B}^\top)^{-1} (\mathbf{x}_k - \eta \mathbf{B} \mathbf{y}_k) - \eta^3 \mathbf{B} \mathbf{B}^\top \mathbf{B} \mathbf{y}_k + \mathbf{E}_x (\mathbf{x}_k - \eta \mathbf{B} \mathbf{y}_k), \quad (112)$$

$$\mathbf{y}_{k+1} = (\mathbf{I} + \eta^2 \mathbf{B}^\top \mathbf{B})^{-1} (\mathbf{y}_k + \eta \mathbf{B}^\top \mathbf{x}_k) + \eta^3 \mathbf{B}^\top \mathbf{B} \mathbf{B}^\top \mathbf{x}_k + \mathbf{E}_y (\mathbf{y}_k + \eta \mathbf{B}^\top \mathbf{x}_k). \quad (113)$$

As in the proof of Theorem 1, we define  $\mathbf{Q}_x = (\mathbf{I} + \eta^2 \mathbf{B} \mathbf{B}^\top)^{-1}$  and  $\mathbf{Q}_y = (\mathbf{I} + \eta^2 \mathbf{B}^\top \mathbf{B})^{-1}$ . Using these definitions we can show that

$$\begin{aligned} \|\mathbf{x}_{k+1}\|^2 &= (\mathbf{x}_k - \eta \mathbf{B} \mathbf{y}_k)^\top \mathbf{Q}_x^2 (\mathbf{x}_k - \eta \mathbf{B} \mathbf{y}_k) + \eta^6 \mathbf{y}_k^\top \mathbf{B}^\top \mathbf{B} \mathbf{B}^\top \mathbf{B} \mathbf{B}^\top \mathbf{B} \mathbf{y}_k \\ &\quad + (\mathbf{x}_k - \eta \mathbf{B} \mathbf{y}_k)^\top \mathbf{E}_x^2 (\mathbf{x}_k - \eta \mathbf{B} \mathbf{y}_k) + 2(\mathbf{x}_k - \eta \mathbf{B} \mathbf{y}_k)^\top \mathbf{E}_x \mathbf{Q}_x (\mathbf{x}_k - \eta \mathbf{B} \mathbf{y}_k) \\ &\quad - 2\eta^3 (\mathbf{x}_k - \eta \mathbf{B} \mathbf{y}_k)^\top \mathbf{E}_x \mathbf{B} \mathbf{B}^\top \mathbf{B} \mathbf{y}_k - 2\eta^3 \mathbf{y}_k^\top \mathbf{B}^\top \mathbf{B} \mathbf{B}^\top \mathbf{Q}_x (\mathbf{x}_k - \eta \mathbf{B} \mathbf{y}_k) \end{aligned} \quad (114)$$

$$\begin{aligned} \|\mathbf{y}_{k+1}\|^2 &= (\mathbf{y}_k + \eta \mathbf{B}^\top \mathbf{x}_k)^\top \mathbf{Q}_y^2 (\mathbf{y}_k + \eta \mathbf{B}^\top \mathbf{x}_k) + \eta^6 \mathbf{x}_k^\top \mathbf{B} \mathbf{B}^\top \mathbf{B} \mathbf{B}^\top \mathbf{B} \mathbf{B}^\top \mathbf{x}_k + (\mathbf{y}_k \\ &\quad + \eta \mathbf{B}^\top \mathbf{x}_k)^\top \mathbf{E}_y^2 (\mathbf{y}_k + \eta \mathbf{B}^\top \mathbf{x}_k) + 2(\mathbf{y}_k + \eta \mathbf{B}^\top \mathbf{x}_k)^\top \mathbf{E}_y \mathbf{Q}_y (\mathbf{y}_k + \eta \mathbf{B}^\top \mathbf{x}_k) \\ &\quad + 2\eta^3 (\mathbf{y}_k + \eta \mathbf{B}^\top \mathbf{x}_k)^\top \mathbf{E}_y \mathbf{B}^\top \mathbf{B} \mathbf{B}^\top \mathbf{x}_k + 2\eta^3 \mathbf{x}_k^\top \mathbf{B} \mathbf{B}^\top \mathbf{B} \mathbf{Q}_y (\mathbf{y}_k + \eta \mathbf{B}^\top \mathbf{x}_k) \end{aligned} \quad (115)$$

Now before adding the two sides of the expressions in (114) and (115), note that some of the cross terms in (114) and (115) cancel out. For instance, using Lemma 1 and Equations (110) and (111) we can show that

$$\begin{aligned} -\eta^3 \mathbf{x}_k^\top \mathbf{E}_x \mathbf{B} \mathbf{B}^\top \mathbf{B} \mathbf{y}_k + \eta^3 \mathbf{x}_k^\top \mathbf{B} \mathbf{B}^\top \mathbf{B} \mathbf{E}_y \mathbf{y}_k &= -\eta^3 \mathbf{x}_k^\top \mathbf{B} \mathbf{E}_y \mathbf{B}^\top \mathbf{B} \mathbf{y}_k + \eta^3 \mathbf{x}_k^\top \mathbf{B} \mathbf{B}^\top \mathbf{B} \mathbf{E}_y \mathbf{y}_k \\ &= -\eta^3 \mathbf{x}_k^\top \mathbf{B} \mathbf{B}^\top \mathbf{E}_x \mathbf{B} \mathbf{y}_k + \eta^3 \mathbf{x}_k^\top \mathbf{B} \mathbf{B}^\top \mathbf{B} \mathbf{E}_y \mathbf{y}_k \\ &= -\eta^3 \mathbf{x}_k^\top \mathbf{B} \mathbf{B}^\top \mathbf{B} \mathbf{E}_y \mathbf{y}_k + \eta^3 \mathbf{x}_k^\top \mathbf{B} \mathbf{B}^\top \mathbf{B} \mathbf{E}_y \mathbf{y}_k \\ &= 0 \end{aligned}$$

By using similar arguments it can be shown that summing two sides of the expressions in (114) and (115) leads to

$$\begin{aligned}
 & \|\mathbf{x}_{k+1}\|^2 + \|\mathbf{y}_{k+1}\|^2 \\
 &= \mathbf{x}_k^\top \mathbf{Q}_x^2 \mathbf{x}_k + \eta^2 \mathbf{y}_k^\top \mathbf{B}^\top \mathbf{Q}_x^2 \mathbf{B} \mathbf{y}_k + \eta^6 \mathbf{y}_k^\top (\mathbf{B}^\top \mathbf{B})^3 \mathbf{y}_k + \mathbf{x}_k^\top \mathbf{E}_x^2 \mathbf{x}_k + \eta^2 \mathbf{y}_k^\top \mathbf{B}^\top \mathbf{E}_x^2 \mathbf{B} \mathbf{y}_k \\
 &\quad + 2\mathbf{x}_k^\top \mathbf{E}_x \mathbf{Q}_x \mathbf{x}_k + 2\eta^2 \mathbf{y}_k^\top \mathbf{B}^\top \mathbf{E}_x \mathbf{Q}_x \mathbf{B} \mathbf{y}_k + 2\eta^4 \mathbf{y}_k^\top \mathbf{B}^\top \mathbf{B} \mathbf{E}_x \mathbf{B} \mathbf{B}^\top \mathbf{B} \mathbf{y}_k + 2\eta^4 \mathbf{y}_k^\top \mathbf{B}^\top \mathbf{B} \mathbf{Q}_y \mathbf{B}^\top \mathbf{B} \mathbf{y}_k \\
 &\quad + \mathbf{y}_k^\top \mathbf{Q}_y^2 \mathbf{y}_k + \eta^2 \mathbf{x}_k^\top \mathbf{B} \mathbf{Q}_y^2 \mathbf{B}^\top \mathbf{x}_k + \eta^6 \mathbf{x}_k^\top (\mathbf{B} \mathbf{B}^\top)^3 \mathbf{x}_k + \mathbf{y}_k^\top \mathbf{E}_y^2 \mathbf{y}_k + \eta^2 \mathbf{x}_k^\top \mathbf{B} \mathbf{E}_y^2 \mathbf{B}^\top \mathbf{x}_k \\
 &\quad + 2\mathbf{y}_k^\top \mathbf{E}_y \mathbf{Q}_y \mathbf{y}_k + 2\eta^2 \mathbf{x}_k^\top \mathbf{B} \mathbf{E}_y \mathbf{Q}_y \mathbf{B}^\top \mathbf{x}_k + 2\eta^4 \mathbf{x}_k^\top \mathbf{B} \mathbf{B}^\top \mathbf{E}_x \mathbf{B} \mathbf{B}^\top \mathbf{x}_k + 2\eta^4 \mathbf{x}_k^\top \mathbf{B} \mathbf{B}^\top \mathbf{Q}_x \mathbf{B} \mathbf{B}^\top \mathbf{x}_k \\
 &= \mathbf{x}_k^\top \mathbf{Q}_x \mathbf{x}_k + \eta^6 \mathbf{y}_k^\top (\mathbf{B}^\top \mathbf{B})^3 \mathbf{y}_k + \mathbf{x}_k^\top \mathbf{E}_x^2 \mathbf{x}_k + \eta^2 \mathbf{y}_k^\top \mathbf{B}^\top \mathbf{E}_x^2 \mathbf{B} \mathbf{y}_k \\
 &\quad + 2\mathbf{x}_k^\top \mathbf{E}_x \mathbf{x}_k + 2\eta^4 \mathbf{y}_k^\top \mathbf{B}^\top \mathbf{B} \mathbf{E}_x \mathbf{B} \mathbf{B}^\top \mathbf{B} \mathbf{y}_k + 2\eta^4 \mathbf{y}_k^\top \mathbf{B}^\top \mathbf{B} \mathbf{Q}_y \mathbf{B}^\top \mathbf{B} \mathbf{y}_k \\
 &\quad + \mathbf{y}_k^\top \mathbf{Q}_y \mathbf{y}_k + \eta^6 \mathbf{x}_k^\top (\mathbf{B} \mathbf{B}^\top)^3 \mathbf{x}_k + \mathbf{y}_k^\top \mathbf{E}_y^2 \mathbf{y}_k + \eta^2 \mathbf{x}_k^\top \mathbf{B} \mathbf{E}_y^2 \mathbf{B}^\top \mathbf{x}_k \\
 &\quad + 2\mathbf{y}_k^\top \mathbf{E}_y \mathbf{y}_k + 2\eta^4 \mathbf{x}_k^\top \mathbf{B} \mathbf{B}^\top \mathbf{E}_x \mathbf{B} \mathbf{B}^\top \mathbf{x}_k + 2\eta^4 \mathbf{x}_k^\top \mathbf{B} \mathbf{B}^\top \mathbf{Q}_x \mathbf{B} \mathbf{B}^\top \mathbf{x}_k
 \end{aligned} \tag{116}$$

where in the second equality we used the simplifications

$$\begin{aligned}
 & \mathbf{x}_k^\top \mathbf{Q}_x^2 \mathbf{x}_k + \eta^2 \mathbf{x}_k^\top \mathbf{B} \mathbf{Q}_y^2 \mathbf{B}^\top \mathbf{x}_k = \mathbf{x}_k^\top \mathbf{Q}_x^2 \mathbf{x}_k + \eta^2 \mathbf{x}_k^\top \mathbf{Q}_x^2 \mathbf{B} \mathbf{B}^\top \mathbf{Q}_x \mathbf{x}_k = \mathbf{x}_k^\top \mathbf{Q}_x \mathbf{x}_k \\
 & \mathbf{y}_k^\top \mathbf{Q}_y^2 \mathbf{y}_k + \eta^2 \mathbf{y}_k^\top \mathbf{B}^\top \mathbf{Q}_x^2 \mathbf{B} \mathbf{y}_k = \mathbf{y}_k^\top \mathbf{Q}_y^2 \mathbf{y}_k + \eta^2 \mathbf{y}_k^\top \mathbf{Q}_y^2 \mathbf{B}^\top \mathbf{B} \mathbf{Q}_y \mathbf{y}_k = \mathbf{y}_k^\top \mathbf{Q}_y \mathbf{y}_k
 \end{aligned} \tag{117}$$

as well as

$$\begin{aligned}
 & \mathbf{x}_k^\top \mathbf{E}_x \mathbf{Q}_x \mathbf{x}_k + \eta^2 \mathbf{x}_k^\top \mathbf{B} \mathbf{E}_y \mathbf{Q}_y \mathbf{B}^\top \mathbf{x}_k = \mathbf{x}_k^\top \mathbf{E}_x \mathbf{Q}_x \mathbf{x}_k + \eta^2 \mathbf{x}_k^\top \mathbf{E}_x \mathbf{Q}_x \mathbf{B} \mathbf{B}^\top \mathbf{x}_k = \mathbf{x}_k^\top \mathbf{E}_x \mathbf{x}_k \\
 & \mathbf{y}_k^\top \mathbf{E}_y \mathbf{Q}_y \mathbf{y}_k + \eta^2 \mathbf{y}_k^\top \mathbf{B}^\top \mathbf{E}_x \mathbf{Q}_x \mathbf{B} \mathbf{y}_k = \mathbf{y}_k^\top \mathbf{E}_y \mathbf{Q}_y \mathbf{y}_k + \eta^2 \mathbf{y}_k^\top \mathbf{E}_y \mathbf{Q}_y \mathbf{B}^\top \mathbf{B} \mathbf{y}_k = \mathbf{y}_k^\top \mathbf{E}_y \mathbf{y}_k
 \end{aligned} \tag{118}$$

Define  $r_k = \|\mathbf{x}_k\|^2 + \|\mathbf{y}_k\|^2$ . We have:

$$\begin{aligned}
 & r_{k+1} \leq \\
 & \mathbf{x}_k^\top (\mathbf{Q}_x + 2\mathbf{E}_x + \mathbf{E}_x^2 + \eta^6 (\mathbf{B} \mathbf{B}^\top)^3 + \eta^2 \mathbf{B} \mathbf{E}_y^2 \mathbf{B}^\top + 2\eta^4 \mathbf{B} \mathbf{B}^\top \mathbf{E}_x \mathbf{B} \mathbf{B}^\top + 2\eta^4 \mathbf{B} \mathbf{B}^\top \mathbf{Q}_x \mathbf{B} \mathbf{B}^\top) \mathbf{x}_k \\
 & + \mathbf{y}_k^\top (\mathbf{Q}_y + 2\mathbf{E}_y + \mathbf{E}_y^2 + \eta^6 (\mathbf{B}^\top \mathbf{B})^3 + \eta^2 \mathbf{B}^\top \mathbf{E}_x^2 \mathbf{B} + 2\eta^4 \mathbf{B}^\top \mathbf{B} \mathbf{E}_y \mathbf{B} \mathbf{B}^\top + 2\eta^4 \mathbf{B}^\top \mathbf{B} \mathbf{Q}_y \mathbf{B} \mathbf{B}^\top) \mathbf{y}_k
 \end{aligned} \tag{119}$$

Choosing  $\eta = \frac{1}{2\sqrt{2\lambda_{\max}(\mathbf{B}^\top \mathbf{B})}}$ , we have:

$$\begin{aligned}
 & r_{k+1} \leq \mathbf{x}_k^\top \left( \mathbf{I} - \frac{1}{2} \eta^2 \mathbf{B} \mathbf{B}^\top + \frac{1}{4} \eta^2 \mathbf{B} \mathbf{B}^\top \right) \mathbf{x}_k + \mathbf{y}_k^\top \left( \mathbf{I} - \frac{1}{2} \eta^2 \mathbf{B}^\top \mathbf{B} + \frac{1}{4} \eta^2 \mathbf{B}^\top \mathbf{B} \right) \mathbf{y}_k \\
 & \leq \left( 1 - \frac{1}{20\kappa} \right) r_k
 \end{aligned} \tag{120}$$

## 8.9 Proof of Theorem 7

Define  $\mathbf{z} = [\mathbf{x}; \mathbf{y}]$  and  $F(\mathbf{z}) = [\nabla_{\mathbf{x}} f(\mathbf{x}, \mathbf{y}); -\nabla_{\mathbf{y}} f(\mathbf{x}, \mathbf{y})]$ . Note that Assumption 3 gives us  $\|F(\mathbf{z}_1) - F(\mathbf{z}_2)\| \leq 2L\|\mathbf{z}_1 - \mathbf{z}_2\|$ . The EG updates can be compactly written as:

$$\mathbf{z}_{k+1} = \mathbf{z}_k - \eta F(\mathbf{z}_{k+1/2}) \tag{121}$$

where

$$\mathbf{z}_{k+1/2} = \mathbf{z}_k - \eta F(\mathbf{z}_k) \tag{122}$$

We write the update in terms of the Proximal Point method with an error  $\varepsilon_k = \eta(F(\mathbf{z}_{k+1}) - F(\mathbf{z}_{k+1/2}))$  as follows:

$$\mathbf{z}_{k+1} = \mathbf{z}_k - \eta F(\mathbf{z}_{k+1}) + \varepsilon_k \tag{123}$$

On squaring and simplifying this expression, we have:

$$\|\mathbf{z}_{k+1} - \mathbf{z}^*\|^2 = \|\mathbf{z}_k - \mathbf{z}^*\|^2 - \|\mathbf{z}_{k+1} - \mathbf{z}_k\|^2 - 2\eta(F(\mathbf{z}_{k+1}) + \varepsilon_k)^\top (\mathbf{z}_{k+1} - \mathbf{z}^*) \tag{124}$$

where  $\mathbf{z}^* = [\mathbf{x}^*; \mathbf{y}^*]$  (Note that  $r_k = \|\mathbf{z}_k - \mathbf{z}^*\|^2$ ). We simplify the right hand side of Equation (124) as follows-

$$\begin{aligned}
& \|\mathbf{z}_k - \mathbf{z}^*\|^2 - \|\mathbf{z}_{k+1} - \mathbf{z}_k\|^2 - 2\eta(F(\mathbf{z}_{k+1}) + \boldsymbol{\varepsilon}_k)^\top(\mathbf{z}_{k+1} - \mathbf{z}^*) \\
&= \|\mathbf{z}_k - \mathbf{z}^*\|^2 - \|\mathbf{z}_{k+1} - \mathbf{z}_k\|^2 - 2\eta(F(\mathbf{z}_{k+1/2}))^\top(\mathbf{z}_{k+1} - \mathbf{z}^*) \\
&= \|\mathbf{z}_k - \mathbf{z}^*\|^2 - 2\eta(F(\mathbf{z}_{k+1/2}))^\top(\mathbf{z}_{k+1} - \mathbf{z}^*) - \|\mathbf{z}_{k+1} - \mathbf{z}_{k+1/2} + \mathbf{z}_{k+1/2} - \mathbf{z}_k\|^2 \\
&= \|\mathbf{z}_k - \mathbf{z}^*\|^2 - 2\eta(F(\mathbf{z}_{k+1/2}))^\top(\mathbf{z}_{k+1} - \mathbf{z}^*) - \|\mathbf{z}_{k+1} - \mathbf{z}_{k+1/2}\|^2 - \|\mathbf{z}_{k+1/2} - \mathbf{z}_k\|^2 \\
&\quad - 2(\mathbf{z}_{k+1} - \mathbf{z}_{k+1/2})^\top(\mathbf{z}_{k+1/2} - \mathbf{z}_k) \\
&= \|\mathbf{z}_k - \mathbf{z}^*\|^2 - 2\eta(F(\mathbf{z}_{k+1/2}))^\top(\mathbf{z}_{k+1} - \mathbf{z}^*) - \|\mathbf{z}_{k+1} - \mathbf{z}_{k+1/2}\|^2 - \|\mathbf{z}_{k+1/2} - \mathbf{z}_k\|^2 \\
&\quad - 2\eta(F(\mathbf{z}_k))^\top(\mathbf{z}_{k+1/2} - \mathbf{z}_{k+1})
\end{aligned} \tag{125}$$

The following part of the proof is inspired by the result of Theorem 1 of Gidel et al. (2019). We simplify the inner products and give a lower bound using strong convexity as follows:

$$\begin{aligned}
& 2\eta(F(\mathbf{z}_{k+1/2}))^\top(\mathbf{z}_{k+1} - \mathbf{z}^*) + 2\eta(F(\mathbf{z}_k))^\top(\mathbf{z}_{k+1/2} - \mathbf{z}_{k+1}) \\
&= 2\eta(F(\mathbf{z}_{k+1/2}))^\top(\mathbf{z}_{k+1/2} - \mathbf{z}^*) + 2\eta(F(\mathbf{z}_k) - F(\mathbf{z}_{k+1/2}))^\top(\mathbf{z}_{k+1/2} - \mathbf{z}_{k+1}) \\
&\geq 2\eta\mu\|\mathbf{z}_{k+1/2} - \mathbf{z}^*\| - 4\eta L\|\mathbf{z}_k - \mathbf{z}_{k+1/2}\|\|\mathbf{z}_{k+1/2} - \mathbf{z}_{k+1}\|
\end{aligned} \tag{126}$$

since  $F(\mathbf{z}^*) = 0$ . Now, using Young's inequality, we have:

$$\begin{aligned}
& 2\eta(F(\mathbf{z}_{k+1/2}))^\top(\mathbf{z}_{k+1} - \mathbf{z}^*) + 2\eta(F(\mathbf{z}_k))^\top(\mathbf{z}_{k+1/2} - \mathbf{z}_{k+1}) \\
&\geq 2\eta\mu\|\mathbf{z}_{k+1/2} - \mathbf{z}^*\|^2 - (4\eta^2 L^2\|\mathbf{z}_k - \mathbf{z}_{k+1/2}\|^2 + \|\mathbf{z}_{k+1/2} - \mathbf{z}_{k+1}\|^2)
\end{aligned} \tag{127}$$

Substituting the above inequality in Equation (125), we have:

$$\|\mathbf{z}_{k+1} - \mathbf{z}^*\|^2 \leq \|\mathbf{z}_k - \mathbf{z}^*\|^2 - 2\eta\mu\|\mathbf{z}_{k+1/2} - \mathbf{z}^*\|^2 + (4\eta^2 L^2 - 1)\|\mathbf{z}_k - \mathbf{z}_{k+1/2}\| \tag{128}$$

Since  $\|\mathbf{z}_{k+1/2} - \mathbf{z}^*\|^2 \leq 2\|\mathbf{z}_k - \mathbf{z}^*\|^2 + 2\|\mathbf{z}_{k+1/2} - \mathbf{z}_k\|^2$ , we have:

$$\|\mathbf{z}_{k+1} - \mathbf{z}^*\|^2 \leq (1 - \eta\mu)\|\mathbf{z}_k - \mathbf{z}^*\|^2 + (4\eta^2 L^2 + 2\eta\mu - 1)\|\mathbf{z}_k - \mathbf{z}_{k+1/2}\| \tag{129}$$

For  $\eta = 1/8L$ , we have  $4\eta^2 L^2 + 2\eta\mu - 1 < 1$  (since  $\mu \leq L$ ), which gives:

$$\|\mathbf{z}_{k+1} - \mathbf{z}^*\|^2 \leq \left(1 - \frac{1}{8\kappa}\right) \|\mathbf{z}_k - \mathbf{z}^*\|^2 \tag{130}$$

where  $\kappa = \frac{L}{\mu}$ .
